1           **The N-terminal executioner domains of NLR immune receptors are functionally**  
2                                           **conserved across major plant lineages**

3  
4 **AUTHORS:**

5 Khong-Sam Chia<sup>1</sup>, Jiorgos Kourelis<sup>2</sup>, Martin Vickers<sup>3</sup>, Toshiyuki Sakai<sup>2</sup>, Sophien Kamoun<sup>2</sup>,  
6 Philip Carella<sup>1\*</sup>

7  
8 **\*Corresponding Author** - Philip Carella (philip.carella@jic.ac.uk)

9  
10 **AFFILIATIONS:**

11 1 – Cell and Developmental Biology, John Innes Centre, Norwich, United Kingdom

12 2 – The Sainsbury Laboratory, University of East Anglia, Norwich, United Kingdom

13 3 – Computational and Systems Biology, John Innes Centre, Norwich, United Kingdom

14  
15  
16 **ABSTRACT:**

17 Nucleotide-binding domain and leucine-rich repeat (NLR) proteins are a prominent class of  
18 intracellular immune receptors that are present across diverse plant lineages. However, our  
19 understanding of plant NLR structure and function is limited to the evolutionarily young flowering  
20 plant clade (angiosperms). Here, we describe an extended spectrum of NLR diversity across  
21 major plant lineages and demonstrate functional conservation of N-terminal ‘executioner’ domains  
22 that trigger immune responses. We show that broadly distributed CC (coiled-coil) and TIR  
23 (toll/interleukin-1 receptor) domains retain executioner function through trans-lineage activation  
24 of immune-related cell death in the model angiosperm *Nicotiana benthamiana*. Further  
25 examination of a CC subfamily specific to non-flowering lineages uncovered an essential N-  
26 terminal MAEPL motif with functional similarity to resistosome-forming CC-NLRs. Ectopic  
27 activation of the MAEPL-type CC in the divergent liverwort *Marchantia polymorpha* led to profound  
28 growth inhibition, defense gene activation, and signatures of cell death resembling CC activity in  
29 flowering plants. Moreover, comparative macroevolutionary transcriptomics in *Marchantia* and  
30 *Nicotiana* identified conserved CC responsive genes, providing further insight into the core  
31 aspects of CC function shared between flowering and non-flowering plants. Our findings highlight  
32 the need to understand NLR structure and function across the full spectrum of plant diversity.

33  
34 **INTRODUCTION:**

35 Immune receptors play a central role in perceiving and responding to host cell invasion by  
36 parasitic organisms. In plants, decades of functional genetic research has solidified the role of  
37 nucleotide-binding domain and leucine-rich repeat (NLR) proteins as intracellular resistance (R)  
38 gene receptors that provide robust defenses against pathogen infection<sup>1,2</sup>. Although genomics  
39 studies have recently revealed the occurrence of NLRs across a diverse range of land plants and  
40 their algae predecessors<sup>3,4</sup>, our understanding of NLR function is limited to the angiosperm  
41 lineage (flowering plants). In fact, each of the ~450 experimentally validated NLRs to date are  
42 from model or crop species of flowering plants. Given that angiosperms are a relatively young  
43 lineage, our current view of NLR diversity and evolution in plants is narrow. In particular, the extent

44 to which plant NLRs are functionally conserved across a deep macroevolutionary timescale is  
45 unknown.

46  
47 NLRs are modular proteins consisting of an N-terminal domain, a central NB-ARC domain, and a  
48 C-terminal region containing leucine rich repeats (LRR) or other superstructure forming repetitive  
49 elements<sup>5,6</sup>. The NB-ARC domain functions as a switch that controls the 'on/off' state of the  
50 receptor, whereas the variable N-terminal domain defines different NLR classes. In plants, NLR  
51 N-terminal domains include the coiled-coil (CC), G10-type CC (CC<sub>G10</sub>), RPW8-type CC (CC<sub>RPW8</sub>)  
52 and toll/interleukin-1 receptor-type (TIR) domains, whereas metazoan NLRs typically encode N-  
53 terminal PYRIN or caspase recruitment domains (CARD)<sup>7-10</sup>. NLR N-terminal domains are viewed  
54 as the 'executioner' domain encoding the biochemical activities that lead to immunity. Indeed,  
55 ectopic expression of N-terminal executioner domains in *planta*, either alone or translationally  
56 fused to fluorescent proteins like YFP, is often sufficient to activate plant immune responses<sup>11,12</sup>.  
57 Typical outputs downstream of NLR N-terminal domain activity include defensive hormone  
58 accumulation/signaling, transcriptional reprogramming, reactive oxygen species (ROS)  
59 accumulation, and in many cases a localized form of programmed cell death known as the  
60 hypersensitive response (HR)<sup>13,14</sup>.

61  
62 Structural and biochemical studies have revealed the molecular functions of NLR subtypes. Upon  
63 pathogen virulence factor-dependent activation, the *Arabidopsis* CC-NLR receptor ZAR1 (hopZ1-  
64 Activated Resistance1) forms higher order oligomer complexes ('resistosome') in which the  
65 primary helix of each CC domain 4-helix bundle assembles into a funnel-shaped structure  
66 predicted to form pores within the plasma membrane<sup>15,16</sup>. In support of this idea, activated  
67 *Arabidopsis* ZAR1 or wheat Sr35 (Stem rust resistance 35) pentamers were shown to accumulate  
68 at lipid bilayers and act as non-selective cation channels *in vitro*<sup>17,18</sup>. This paradigm was further  
69 confirmed for the CC<sub>RPW8</sub> domains of *Arabidopsis* NRG1 and ADR1, which exhibited  
70 oligomerization-dependent ion channel activity requiring the N-terminal region of the CC<sub>RPW8</sub>  
71 domain<sup>19</sup>. By contrast, activation of the *Arabidopsis* TNL receptors RPP1 and ROQ1 induces  
72 oligomerization that reconstitutes a TIR holoenzyme complex capable of hydrolyzing NAD<sup>+</sup>  
73 (nicotinamide adenine dinucleoside) to produce small molecules that bind to EDS1 (ENHANCED  
74 DISEASE SUSCEPTIBILITY1) regulatory complexes<sup>20-23</sup>. This, in turn, recruits CC<sub>RPW8</sub>-NLR  
75 receptors to execute plant immune responses<sup>22-24</sup>.

76  
77 In plants, NLRs function at varying levels of connectivity, ranging from standalone 'singleton'  
78 receptors sufficient to induce NLR-mediated immunity, paired NLRs that distribute perception  
79 (sensor) and transduction (helper) activities, and in fortified networks where a minimal set of  
80 helper NLRs function alongside an extensive repertoire of sensors<sup>25</sup>. Within this framework,  
81 several conceptual models have emerged to explain how NLRs are poised to monitor for  
82 pathogen virulence factors (effectors) and/or their activity. While direct interactions between  
83 pathogen effectors and plant NLRs can occur, not all effectors directly interact with cognate NLR  
84 receptors<sup>1</sup>. In many instances NLRs monitor (or *guard*) the integrity of key host proteins and  
85 activate immunity upon effector-mediated disruption<sup>26</sup>. NLRs also monitor non-functional 'decoy'  
86 guardees that are often related to functionally relevant host targets<sup>27</sup>. Strikingly, such decoy  
87 domains are frequently incorporated within NLRs themselves, with the resulting 'integrated

88 domain' responsible for effector recognition being genetically fused to the canonical NLR  
89 structure<sup>6</sup>.

90

91 Our understanding of NLR form and function is limited to angiosperms (flowering plants), which  
92 are an evolutionarily young lineage that diverged from non-flowering ancestors approximately 209  
93 million years ago in the Upper Triassic era<sup>28</sup>. The first land plants evolved from freshwater  
94 charophyte algal predecessors over 500 million years ago (Cambrian-Ordovician) and diverged  
95 into several key lineages that predate the angiosperms<sup>29</sup>. This includes the non-vascular seed-  
96 free bryophytes (liverworts, hornworts, and mosses), vascular seed-free lineages like lycophytes  
97 (clubmosses) and monilophytes (ferns and horsetails), and the seed-bearing but non-flowering  
98 gymnosperms (conifers, cycads, ginkgos, and gnetophytes). Genomics data demonstrates that  
99 NLRs are present across land plants and in some of their algal predecessors<sup>3,4,30</sup>. However,  
100 functional analyses of NLRs from non-flowering plants are lacking. In particular, the extent to  
101 which NLR immune receptors or their N-terminal executioner domains are functionally conserved  
102 across the full spectrum of plant evolution is unknown.

103

104 In this study, we undertook a comparative macroevolutionary approach to understand the extent  
105 to which NLRs are functionally conserved across divergent plant lineages. Using the NLRtracker  
106 annotation tool<sup>8</sup>, we defined the NLR immune receptor repertoires of distantly related land plant  
107 and algal genomes for comparison against an extensive set of angiosperm NLRs<sup>8,31</sup>. Phylogenetic  
108 analysis of the central NB-ARC coupled with orthology analysis of N-terminal domains revealed  
109 the diversity and evolutionary history of NLR subtypes across plant lineages. *In planta* expression  
110 screening of widely distributed NLR N-terminal executioner domains (CC, CC<sub>RPW8</sub>, and TIR)  
111 sampled across divergent plants and algae demonstrated deep functional conservation of HR cell  
112 death induction in *N. benthamiana*. Further examination of a novel CC domain subtype enriched  
113 in non-flowering plants uncovered molecular and mechanistic similarities to angiosperm CC  
114 domains. Moreover, phenotypic dissection of non-flowering CC activity in *Nicotiana* and the model  
115 liverwort *M. polymorpha* identified shared aspects of the CC response despite over 450 million  
116 years of divergence. Collectively, our data reveal deep evolutionary conservation of NLR immune  
117 receptor executioner domains in plants and hints toward an ancestral CC-mediated immune  
118 program.

119

## 120 **RESULTS:**

121

### 122 **Major plant lineages harbor an extended spectrum of NLR immune receptors**

123

124 To understand the diversity of NLR immune receptors present across distantly related green  
125 plants, we applied the NLR annotation tool 'NLRtracker'<sup>8</sup> to representative non-flowering plant  
126 genomes. While our primary focus was on terrestrial seed-free plants (bryophytes, lycophytes,  
127 and monilophytes), we included two streptophyte algae and a gymnosperm (seed-bearing but  
128 non-flowering) for comparison alongside an experimentally validated set of angiosperm NLRs  
129 (RefPlantNLR)<sup>8</sup>. Collectively, our set includes 19 organisms and captures green lineage diversity  
130 across >500 million years of evolutionary divergence, inclusive of freshwater aquatic algae (sister  
131 to all terrestrial plants), non-vascular/seed-free bryophytes, vascular but seed-free

132 lycophytes/monilophytes, and non-flowering gymnosperms alongside angiosperm NLRs (Figure  
133 1A). NLRtracker identified full length NLRs, degenerated NLRs, and additional NB-ARC-  
134 containing proteins (other) in all tested species (Data S1). Large NLR repertoires were observed  
135 in mosses (especially *Ceratodon purpureus*; >231), the terrestrial fern *Ceratopteris richardii* (97),  
136 and the gymnosperm *Ginkgo biloba* (248) (Figure 1B). An analysis of NB-ARC domain  
137 classification revealed an expansion of TIR-type NB-ARC domains in *Ceratodon* and *Ginkgo*,  
138 whereas the remaining non-flowering NB-ARC domains were classified as 'Other' or  
139 'undetermined' (Figure 1C).

140  
141 Further characterization of NLR subdomain composition revealed a diverse set of immune  
142 receptor architectures that included subtypes common to angiosperms (TIR, CC, and CC<sub>RPW8</sub>),  
143 with notable expansions of TIR-NLRs in mosses and *Ginkgo*. Moreover, NLRtracker identified  
144 receptor subtypes specific to non-flowering lineages, which included receptors containing an N-  
145 terminal  $\alpha\beta$ -hydrolase (Hyd-NLRs), protein kinase (Pkn-NLRs), or a 4-helix bundle (Cbl-N  
146 domain) with homology to the N-terminus of the human CBL (Casitas B-lineage Lymphoma)  
147 proto-oncogene (Figure 1D). We henceforth included the Cbl-N domain in the broader CC subtype  
148 classification since AlphaFold2-based structural predictions suggest a 4-helix bundle  
149 conformation reminiscent of angiosperm CC and CC<sub>RPW8</sub> domains (Figure S1). Lastly, we  
150 cataloged NLRs harboring integrated domains (NLR-IDs) at the N or C-terminus of the receptor.  
151 This revealed an expansion of NLR-IDs in mosses and *Ginkgo*, whereas the remaining non-  
152 flowering lineages generally lacked integrated domains (Figure 1E, Data S1). NLR-IDs represent  
153 ~4% of the combined non-flowering NLRome. Altogether, NLRtracker confirms the widespread  
154 prevalence of NLRs across green plants and highlights the expanded diversity of immune  
155 receptors in non-flowering lineages.

### 156 157 **NLRs share deep evolutionary ancestry despite N-terminal executioner domain diversity**

158  
159 We further explored the evolutionary history and diversification of NLRs using orthology analysis  
160 (Orthofinder) of N-terminal executioner domains alongside maximum likelihood phylogenetic  
161 analysis of the central NB-ARC (Figure 2A). Orthofinder identified 196 orthologous protein groups  
162 (orthogroups) amongst NLR N-terminal domains in green plants (Data S1). To focus on the most  
163 prevalent domains we prioritized orthogroups (OGs) within 2 or more species that had at least 10  
164 unique loci, which revealed 11 major groups (Figure 2B). The OG0 TIR domain was the largest  
165 and most widely distributed orthogroup, followed by OG1 ( $\alpha\beta$ -hydrolase), OG2 (TIR), OG3 (Cbl-  
166 N-type CC), OG4 (protein kinase), OG6 (ZAR1-type seed plant CC), and OG15 (ADR1/NRG1-  
167 type CC<sub>RPW8</sub>). We also identified putative CC-like (OG7, OG8, OG13) and small/truncated beta  
168 barrel-like N-terminal domains (OG18), with structures predicted by AlphaFold2 (Figure S1). The  
169 majority of these orthogroups were enriched in representative non-flowering lineages, with  
170 exception of OG0 (widely distributed TIR), OG6 (seed plant ZAR1-type CC), and OG15 (seed  
171 plant ADR1/NRG1-type CC<sub>RPW8</sub>). Phylogenetic analysis of the NB-ARC domain demonstrated a  
172 clear separation of TIR and CC-type NLR clades irrespective of lineage. Similar to previous work  
173 on *M. polymorpha* and *Physcomitrium patens* NLRs<sup>3,4</sup>, our NB-ARC phylogeny places the vast  
174 majority of hydrolase and protein-kinase containing NLRs within a larger clade of TIR-NLRs  
175 (Figure 2C), suggesting that Hyd-NLRs and Pkn-NLRs were derived from an ancestral TIR-type

176 NB-ARC. The only exception to this was the presence of two *C. purpureus* (moss) Pkin-NLRs  
177 within the CC clade, indicating an independent birth of these two receptors. Several atypical NLR-  
178 proteins were sister to the CC clade, including the TNP family<sup>32</sup> of TIR-NBARC-TPR receptors  
179 originating in algae and present in land plants. Lastly, the highly prevalent CC-type OG3 domain  
180 enriched in non-flowering lineages was embedded within the CC clade between NLRs harboring  
181 the CC<sub>RPW8</sub> and angiosperm CC domains. Collectively, these analyses reveal the deep  
182 evolutionary history of NB-ARC-containing NLR immune receptors and further highlight the  
183 diversity of N-terminal executioner domains encoded by non-flowering plants.

184

### 185 **The N-terminal executioner domains of NLR immune receptors are functionally conserved** 186 **across major plant lineages**

187

188 Our phylogenetic and orthology analyses demonstrate the ubiquitous nature of NLR subtypes  
189 across major plant lineages. However, the extent to which divergent NLRs are functionally  
190 conserved over a macroevolutionary timescale remains unknown. To address this, we screened  
191 the N-terminal executioner domains of diverse TIR and CC-type receptors for their ability to  
192 activate HR cell death when transiently expressed as eYFP fusions in the angiosperm *N.*  
193 *benthamiana* (Figure 3A, Data S2). We observed moderate-to-strong cell death phenotypes in 5  
194 of 20 TIR domains cloned from non-flowering plants, with those from mosses (*P. patens* and  
195 *Sphagnum fallax*), ferns (*C. richardii*), and gymnosperms (*G. biloba*) exhibiting activity stronger  
196 than the *Arabidopsis* RPS4 control (Figure 3B; Data S2B). TIR fusions were also screened in *N.*  
197 *tabacum* since TIR-mediated cell death is typically stronger in this species. As anticipated,  
198 enhanced TIR-mediated cell death was observed in *N. tabacum* relative to *N. benthamiana* (Data  
199 S2C). In comparison to TIRs, a diverse collection of CC-type domains induced strong HR cell  
200 death in *N. benthamiana* (Figure 3C; Data S2D). This covered approximately 70% of tested  
201 domains from all non-flowering lineages alongside the angiosperm MLA10 (CC) and ADR1  
202 (CC<sub>RPW8</sub>) controls. Predicted CC-type domains from the streptophyte alga *Chara braunii* (OG97,  
203 OG164, OG165) were used as an outgroup to land plants (Figure S1), with moderate-to-strong  
204 activity observed for 3 of 5 tested domains. In addition, we independently assayed each of the  
205 two CC domains present within predicted *M. polymorpha* tandem CC-CC-NLR receptors  
206 (Mp3g09180 and Mp3g09210), identifying HR-induction for the internal CC of Mp3g09210 only.  
207 Importantly, immunoblots confirmed stable expression of CC/TIR-eYFP fusion proteins, apart  
208 from a minority of domains inducing strong cell death phenotypes (Data S3A). Together these  
209 data demonstrate the conserved functionality of TIR and CC-type domains, highlighting a deep  
210 evolutionary origin of NLR immune receptor executioner domains in plants.

211

### 212 **Non-flowering plants encode a unique CC<sub>OG3</sub> domain that harbors a sequence conserved** 213 **N-terminal 'MAEPL' motif**

214

215 The broad distribution of functionally conserved CCs suggests that common principles underpin  
216 their activity despite over 500 million years of green plant evolution. To identify conserved and  
217 functionally relevant features in divergent CCs, we queried the highly prevalent CC<sub>OG3</sub> domains  
218 of non-flowering plants for enriched amino acid sequence motifs using MEME (Multiple EM for  
219 Motif Elicitation)<sup>33</sup>. While this revealed several conserved motifs across the entire CC<sub>OG3</sub> domain

220 (Data S4AB), we focused on two adjacent motifs present at the N-terminus given their prevalence  
221 (79/80 and 38/80) and because similarly situated motifs underpin CC function in angiosperms<sup>19,34</sup>.  
222 Sequence alignment of this region revealed a conserved consensus motif at the CC<sub>OG3</sub> N-  
223 terminus that we named “MAEPL” (Figure 4A; Data S4C). We used this alignment to build a  
224 Hidden Markov Model (HMM) profile for further examination of MAEPL prevalence across green  
225 plant proteomes via the HMMER tool<sup>35</sup>. Overall, HMM profiling of non-flowering proteomes  
226 identified high-scoring MAEPL matches in NLRs predicted by NLRtracker (Figure S2A). In  
227 comparison, an analysis of MAEPL prevalence in the well-annotated angiosperm proteomes of  
228 *A. thaliana* and *Solanum lycopersicum* identified only low scoring hits in NLR and non-NLR  
229 proteins alike (Figure S2B). To extend this comparison further, we interrogated the angiosperm  
230 NLR atlas (>90,000 NLRs)<sup>31</sup> and our combined set of non-flowering lineage NLRs for the  
231 presence MAEPL-like motifs, which revealed an increased occurrence of high-scoring motifs in  
232 non-flowering plants relative to angiosperms (Figure 4B; Figure S2C). In contrast, the similarly  
233 situated N-terminal MADA<sup>34</sup> motif of angiosperm CC domains was enriched in angiosperms but  
234 not non-flowering plants (Figure 4B; Figure S2D). Despite these differences, alignments  
235 comparing non-flowering MAEPL and angiosperm MADA N-terminal motifs demonstrate  
236 intriguing similarities in their composition (Figure 4C; Data S4D), including commonly situated  
237 leucine residues critical for MADA function in angiosperms<sup>34</sup>. Taken together, these results hint  
238 to a common framework for CC N-terminal motif functionality that diverged as angiosperms split  
239 from non-flowering predecessors.

240

#### 241 **MAEPL is required for CC<sub>OG3</sub> activity and is a functional analog of the angiosperm MADA** 242 **motif**

243

244 To determine the functional relevance of MAEPL we generated N-terminal truncations of three  
245 CC<sub>OG3</sub>-eYFP fusions (MpCNL1, MppCNL1, and CrCNL1) and assessed their ability to activate  
246 HR cell death in *N. benthamiana*. In each instance, MAEPL-truncations ( $\Delta$ N) failed to induce cell  
247 death whereas wildtype MAEPL-containing CC-eYFP fusions (WT) were fully competent (Figure  
248 4DE; Data S2E). Next, we generated MAEPL motif variants in which conserved leucine residues  
249 (hydrophobic) were replaced by glutamic acid (hydrophilic), a strategy shown to impact  
250 angiosperm MADA functionality<sup>34</sup>. Again, wild-type CC<sub>OG3</sub>-eYFP controls were fully competent  
251 while double (2E) or triple (3E) L-to-E mutations abolished HR-cell death (Figure 4DE; Data S2F).  
252 Together, these data demonstrate that the MAEPL motif is essential for CC<sub>OG3</sub> function in a  
253 manner analogous to the angiosperm MADA motif. To address this similarity, we tested whether  
254 MAEPL motifs from non-flowering CCs can functionally replace MADA in an auto-active variant  
255 of the NbNRC4 angiosperm helper CC-NLR (Figure 4F). The autoactivated NbNRC4<sup>D478V</sup>-6HA  
256 receptor retaining its original MADA motif elicited strong HR cell death, while the MADA disrupted  
257 L9E variant was non-functional (Figure 4G; Data S2G). As a control, we generated a MADA-to-  
258 MADA chimera with the N-terminal motif of Arabidopsis AtCAR1, which effectively rescued HR  
259 cell death. Several MAEPL-NbNRC4<sup>D478V</sup>-6HA chimeras exhibited strong HR cell death  
260 comparable to NbNRC4<sup>D478V</sup>-6HA (Figure 4G; Data S2G), indicating that MAEPL can indeed  
261 replace MADA. Importantly, conserved leucine residues within the MAEPL motif were essential  
262 for this activity, as the L-to-E variants of MpCNL1, MppCNL1, and CrCNL1 chimeras failed to elicit

263 an HR (Figure 4G; Data S2G). Immunoblots confirmed stable expression for all domains, variants,  
264 and chimeras in *N. benthamiana* (Data S3BC).

265  
266 Emerging data indicates that resistosome-forming MADA-CC-NLRs associate with the plasma  
267 membrane<sup>34,36</sup>, which is often observed as discontinuous fluorescent punctae along the  
268 membrane in confocal fluorescence microscopy experiments. Similar to angiosperm MADA-type  
269 NLRs, the MAEPL MpCNL1 (Mp3g09150) CC<sub>OG3</sub>-eYFP fusion revealed clear puncta formation  
270 that discontinuously localized with a Remorin (REM1.3)-RFP plasma membrane marker, while a  
271 GUS-YFP control was nucleocytoplasmic (Figure S3A). Puncta formation was not altered in  
272 MpCNL1 2E or 3E MAEPL variants (Figure S3A), consistent with observations of stabilized MADA  
273 mutant localization in angiosperms<sup>34,36,37</sup>. Collectively, these data demonstrate that the divergent  
274 MAEPL motif of non-flowering land plants is functionally analogous to the angiosperm MADA.

### 275 276 **MAEPL-CC<sub>OG3</sub> activates immune-like responses in the liverwort *Marchantia polymorpha***

277  
278 The functional conservation of divergent executioner domains in *N. benthamiana* prompted us to  
279 examine whether MAEPL-CC<sub>OG3</sub> activates immune responses in non-flowering plants. To address  
280 this, we used the model experimental liverwort *M. polymorpha*, a bryophyte species that diverged  
281 from *N. benthamiana* over 450 million years ago<sup>38</sup>. Using an estradiol-based (XVE) conditional  
282 expression system<sup>39</sup>, we interrogated the function of the MpCNL1 (Mp3g01950) MAEPL-CC<sub>OG3</sub>  
283 domain in the wild-type TAK1 accession. The importance of the MAEPL motif was assessed by  
284 comparing the activity of full length MpCNL1<sup>CC</sup>-eYFP (MpC1) against an N-terminally truncated  
285 MpCNL1<sup>CCΔN</sup>-eYFP variant (MpC1ΔN) and an mCitrine-HA (mCit-HA) control. Severe growth  
286 inhibition was specifically observed in MpC1 liverworts cultivated directly on estrogen-  
287 supplemented media, which displayed dark pigmentation characteristic of biotic<sup>40</sup> and abiotic<sup>41</sup>  
288 stress in *Marchantia* (Figure 5A; Figure S4A). By contrast, MpC1ΔN and mCit-HA lines cultivated  
289 with estradiol remained healthy, similar to all DMSO controls. These results were further  
290 confirmed by exogenous estradiol application in 3 week-old liverworts, with MpC1 lines exhibiting  
291 tissue darkening and brown phenolic-like deposits at apical notches. Again, DMSO controls as  
292 well as estrogen-treated MpC1ΔN and mCit-HA remained healthy (Figure 5B; Figure S4B).  
293 Importantly, immunoblotting confirmed estradiol-dependent accumulation of the mCitrine-HA  
294 control and MpCNL1<sup>CC</sup>-eYFP (Data S3D). In comparison, MpC1ΔN lines exhibited reduced  
295 stability in liverwort cells such that full length MpCNL1<sup>CCΔN</sup>-eYFP fusions were detected alongside  
296 eYFP cleavage products (Data S3D).

297  
298 Next, we performed the commonly used technique of trypan blue staining<sup>42</sup> to determine whether  
299 MAEPL-CC<sub>OG3</sub> causes cell death in liverworts. As outlined in the methods and supporting data,  
300 we were unable to obtain conclusive results due to technical difficulties in our liverwort expression  
301 system (Fig. S4CD). We therefore performed ion leakage assays, which are routinely used to  
302 monitor membrane integrity and serve as a proxy for NLR-mediated cell death in angiosperms<sup>43</sup>.  
303 Here, we observed consistent increases in sample conductivity caused by ion leakage in  
304 estradiol-treated MpC1 tissues from 4-48 hpi, whereas MpC1ΔN and mCit-HA liverworts exposed  
305 to estradiol displayed minimal conductivity comparable to DMSO-treated controls (Figure 5C;  
306 Figure S4E). Collectively, these results demonstrate that the MAEPL-CC<sub>OG3</sub> domain activates an

307 immune-like response that overlaps with well-established executioner domain outputs of flowering  
308 plants.

309

### 310 **The MAEPL-CC<sub>OG3</sub> domain forms membrane-localized puncta in liverwort cells**

311

312 Since MAEPL-CC<sub>OG3</sub>-eYFP was observed at membrane-localized puncta in angiosperms, we  
313 performed confocal microscopy to examine whether puncta similarly form in non-flowering plants.  
314 Confocal microscopy revealed that the MpCNL1<sup>CC</sup>-eYFP fusion formed discontinuous puncta that  
315 overlapped with plasma-membrane localized myristolated-mScarlet in liverwort cells (Figure 5D).  
316 We also observed MpCNL1<sup>CC</sup>-eYFP signals within intracellular inclusion bodies (Figure S3B). By  
317 comparison, N-terminally truncated MpCNL1<sup>CCΔN</sup>-eYFP exhibited nucleocytoplasmic distribution.  
318 Together, these data demonstrate that membrane-localized puncta formation is conserved in non-  
319 flowering plants and suggests that MAEPL-CC<sub>OG3</sub> targets the membrane for immune-related  
320 activity in plant cells.

321

### 322 **MAEPL-CC<sub>OG3</sub> activates liverwort defense gene expression**

323

324 To gain a more comprehensive understanding of how the MAEPL-CC<sub>OG3</sub> domain activates  
325 immune-related responses in liverworts, we performed RNA-sequencing (RNA-seq) experiments  
326 comparing gene expression profiles of estradiol-treated MpC1 (XVE:MpCNL1<sup>CC</sup>-eYFP line 1),  
327 MpC1ΔN (XVE:MpCNL1<sup>CCΔN</sup>-eYFP line 3), and mCit-HA (XVE:mCitrine-HA) liverworts at 24 hpi.  
328 Transcriptomes of mCit-HA and MpC1ΔN were largely overlapping, whereas MpC1 liverworts  
329 displayed a drastic change in their expression profile (Figure 6A; Figure S5AB). Differential  
330 expression analysis (log<sub>2</sub> fold change [LFC] ≥ 2 and adjusted p < 10<sup>-3</sup>) comparing MpC1 or  
331 MpC1ΔN to the mCit-HA control identified a large set of differentially expressed genes (DEGs) in  
332 MpC1 relative to the MAEPL-truncated MpC1ΔN (Figure 6B; Figure S5C; Data S5). To further  
333 support these data, we validated a subset of CC<sub>OG3</sub>-responsive genes by qRT-PCR (Figure S5D).  
334 Functional enrichment analyses comparing up and downregulated genes of estradiol-treated  
335 MpC1 further defined the CC<sub>OG3</sub> response of liverworts. Terms associated with plant defense  
336 responses and biosynthetic activity were enriched in upregulated genes, whereas several terms  
337 associated with growth, cellular homeostatic functions, and redox activity were enriched in  
338 downregulated genes (Data S5). In comparison, only 18 transcripts were differentially expressed  
339 in MpC1ΔN versus mCit-HA controls. While this may be explained by reduced functionality and  
340 stability of MpC1ΔN-eYFP fusions, several CC<sub>OG3</sub>-NLRs were specifically upregulated in  
341 MpC1ΔN but not MpC1 liverworts (Data S5), which hints towards compensatory feedback caused  
342 by CC dysfunction. Altogether, RNA-seq analysis demonstrates that MAEPL-CC<sub>OG3</sub> activity  
343 induces a strong molecular response that prioritizes plant defenses over normal growth and  
344 cellular functions in liverworts. This growth-defense tradeoff is reminiscent of known NLR  
345 autoactivity phenotypes in angiosperm models like *Arabidopsis*<sup>44</sup>, however the extent to which  
346 NLR-mediated responses are conserved across distantly related lineages remains unknown.

347

### 348 **MAEPL-CC<sub>OG3</sub> activates conserved immune-like transcriptional responses in flowering and** 349 **non-flowering plants**

350



351 The MAEPL-CC<sub>OG3</sub> executioner domain activates immune-like responses in flowering and non-  
352 flowering plant species that diverged over 450 million years ago. To understand the extent to  
353 which these responses overlap, we compared the MpCNL1<sup>CC</sup>-eYFP activated transcriptome of  
354 *Marchantia* to the model angiosperm *N. benthamiana*. To accomplish this, we performed further  
355 RNA-seq analyses in *N. benthamiana* leaves transiently expressing MpCNL1<sup>CC</sup>-eYFP (MpC1),  
356 MAEPL-truncated MpCNL1<sup>CCΔN</sup>-eYFP (MpC1ΔN), the angiosperm MLA10<sup>CC</sup>-eYFP (MLA10), and  
357 a GUS-YFP control. Differential gene expression analyses revealed strong transcriptional shifts  
358 for MpC1 and MLA10 relative to the inactive GUS-YFP and MpC1ΔN controls (Figure 6C; Figure  
359 S5EF; Data S5). The expression profiles of MLA10 and MpC1 largely overlapped, with  
360 approximately 75% of all CC-upregulated genes shared between treatments (Figure 6C; Figure  
361 S5G). This suggests that the divergent CC<sub>OG3</sub> behaves similar to the angiosperm MLA10 CC  
362 domain, consistent with the fact that each domain causes significant cell death in *N. benthamiana*  
363 leaves.

364  
365 Next, we assessed the extent to which MpCNL1<sup>CC</sup>-eYFP transcriptional responses are shared  
366 between *Nicotiana* and *Marchantia*. First, we defined sets of orthologous protein-coding genes  
367 (orthogroups) using OrthoFinder<sup>45</sup>. This revealed a total of 6684 orthogroups, of which 1511 were  
368 single copy (one-to-one corresponding) orthologs. We observed relatively few single copy  
369 orthologs with shared expression profiles in our early timepoint CC-induction transcriptomes, with  
370 5 commonly upregulated and 8 commonly downregulated genes (Figure 6E; Data S5). We  
371 therefore expanded our analysis to multi-copy orthologs, which revealed a larger number of genes  
372 shared between *Nicotiana* and *Marchantia*. Overall, expression profiles were generally congruent  
373 as ~73% of orthologous DEGs were commonly up- or down-regulated (Figure 6E). Intriguingly,  
374 commonly downregulated orthologs represented the largest shared gene set between CC-  
375 induced *Marchantia* and *Nicotiana* tissues. Functional enrichment analyses identified a suite of  
376 DNA-associated machinery, including general transcription factors, replication machinery, and  
377 chromatin maintenance genes (Figure 6E; Data S5). By contrast, common CC upregulated genes  
378 included a collection of phenylpropanoid-related enzymes, ATP-citrate lyases, and members of  
379 the PR4 family. Collectively, these data suggest an evolutionarily conserved molecular response  
380 to CC activity that is likely centered on the induction of biochemical immunity alongside the  
381 repression of DNA/chromatin homeostasis.

## 382 383 **DISCUSSION**

384  
385 In this study, we demonstrate that NLR immune receptors have retained functionality in their N-  
386 terminal domains across 500 million years of plant evolution. We used the angiosperm model *N.*  
387 *benthamiana* to show that CC and TIR domains from algae to gymnosperms are capable of trans-  
388 lineage immune activation. Given the large evolutionary distances separating these lineages  
389 within the plant kingdom, we hypothesize that CC and TIR executioner domains arose early during  
390 plant evolution and have retained their biochemical functions throughout the conquest of land.

391  
392 We functionally validated the immune activity of a diverse set of CC-type N-terminal domains  
393 across plant and algal genomes. The capacity of diverse CC domains to activate HR cell death in  
394 *N. benthamiana* reveals their ubiquitous role as executioners of plant programmed cell death. The

395 trans-lineage activity of OG97 CC-like domains from the streptophyte alga *C. braunii* particularly  
396 supports this, as it diverged from land plants over 550-750 million years ago<sup>29</sup>. Fungal and  
397 metazoan N-terminal 4 helix bundle domains cause cell death in an analogous fashion to plant  
398 CC domains<sup>12,46-48</sup>. Intriguingly, CC domain mechanisms may be widely transferable between  
399 kingdoms as cell death was reported in metazoan cells expressing angiosperm CC-NLRs<sup>18,19</sup>.  
400 While this remains to be explored in further detail, these findings suggest that fundamental  
401 biochemical mechanisms may underpin the function of CC-like 4 helix bundles across the tree of  
402 life.

403  
404 The CC<sub>OG3</sub> domain, which generally carries the MAEPL motif at its very N-terminus, is the most  
405 common CC subtype in non-flowering lineages. We found that the MAEPL motif is essential for  
406 cell death activity in a manner analogous to the MADA motif that occurs in about 20% of  
407 angiosperm CC-NLRs<sup>34</sup>. HMM profiling of MAEPL and MADA motifs across plant NLRs supports  
408 their divergence, with each motif enriched in their respective lineage. Nevertheless, MAEPL motifs  
409 from non-flowering plants functionally replaced the MADA motif of the angiosperm helper NLR  
410 NbNRC4 despite >450 million years of divergence. We hypothesize that MAEPL and MADA are  
411 derived from an ancestral motif, as phylogenetic analysis of CC<sub>OG3</sub>-NLRs and angiosperm CC-  
412 NLRs supports common ancestry. While each type of motif has diversified in overall sequence  
413 composition, conserved hydrophobic leucine residues are essential for non-flowering MAEPL  
414 activity similar to angiosperm MADA motifs<sup>34</sup>. The proper placement of hydrophobic residues  
415 within N-terminal helices therefore presents as a defining feature of CC-type executioner  
416 domains. This implies that sequence variation at the N-terminus can be accommodated provided  
417 that the appropriate distribution of hydrophobic residues is maintained. In agreement with this  
418 hypothesis, CC<sub>RPW8</sub> executioner domains encode an N-terminal motif that is distinct from  
419 angiosperm CCs but retains similarly placed hydrophobic residues<sup>19</sup>. It is therefore conceivable  
420 that a range of N-terminal motifs have evolved within the diverse CC domains of plants. Precise  
421 biochemical mechanisms underpinning cell death activity remain to be clarified, though several  
422 lines of evidence point towards their involvement in the targeted disruption of cellular membranes  
423 and ion channel activity<sup>15,17,34,49</sup>. Further dissection of N-terminal motif evolution is therefore  
424 critical for revealing keystone molecular mechanisms of plant CC-NLR-mediated immunity.

425  
426 We hypothesize that CC<sub>OG3</sub>-type NLRs carrying MAEPL function as singleton or helper NLRs in  
427 non-flowering lineages as is suggested for MADA-CC-NLRs<sup>34</sup>. By contrast, a prominent signature  
428 of sensor NLRs is the presence of integrated domains that bait pathogen effectors. In  
429 angiosperms, NLR-IDs form 5-10% of the NLRome<sup>6</sup>. Here, we identified a varying range of NLR-  
430 IDs across diverse NLR subtypes within ~4% of the non-flowering plant NLRome. We failed to  
431 detect NLR-IDs in MAEPL-CC-NLRs, further supporting the idea that they function as singleton  
432 or helper NLRs. The integrated domains of non-flowering plants show similarity to angiosperm  
433 NLR-IDs and include protein domains known to be targeted by pathogen effectors like kinases,  
434 zinc fingers, thioredoxins, and transcription factors<sup>6,50</sup>. Moreover, non-flowering NLR-IDs were  
435 incorporated into broadly distributed (CC-NLRs & TIR-NLRs) as well as lineage-specific (Hyd-  
436 NLRs & Pkn-NLRs) immune receptors. At present, direct evidence for pathogen-induced NLR-  
437 mediated immunity is limited to angiosperms and remains to be discovered in non-flowering  
438 lineages. Whether MAEPL-CC-NLRs serve as helpers to activate immunity upon the perception

439 of effectors by diverse sensor NLRs is an intriguing starting point for the future dissection of NLR-  
440 mediated immunity in non-flowering plants.

441  
442 In *Marchantia*, MAEPL CC accumulation activated an immune-like response that included ion  
443 leakage and tissue browning that is often associated with oxidative and/or biotic stress in  
444 bryophytes<sup>51–53</sup>. Transcriptome analysis revealed a strong induction of pathogenesis-related and  
445 phenylpropanoid biosynthesis genes that are characteristic of induced defenses in  
446 *Marchantia*<sup>40,54</sup>. Further comparisons between *Marchantia* thalli and *Nicotiana* leaves provided  
447 our first look into shared CC responses in divergent plants. Here, the downregulation of cell  
448 homeostasis and chromatin-associated machinery was a common consequence of CC activation.  
449 Intriguingly, this included MiniChromosome Maintenance (MCM) complex genes involved in DNA  
450 replication. In metazoans, depletion of MCM abundance is associated with DNA replication failure  
451 leading to apoptosis<sup>55,56</sup>. In plants, MCM depletion causes ovule abortion and activation of the  
452 DNA damage response<sup>57,58</sup>. Consistent with these observations, direct activation of the CC-NLR  
453 RPM1 induces DNA damage in the model angiosperm *A. thaliana*<sup>59</sup>. Collectively, these  
454 observations suggest that the activation of NLR-mediated immunity perturbs DNA replication  
455 homeostasis leading to DNA damage and cell death. Whether this represents an ancestral  
456 component of the CC-NLR immune response remains to be clarified.

457  
458 The broadly distributed TIR domain has a deep evolutionary history and contributes to immunity  
459 in plants, animals, fungi, oomycetes, bacteria, and archaea<sup>5</sup>. Indeed, functional interrogation of  
460 TIR domains has demonstrated conserved activity across angiosperms, as monocot TIR-only  
461 proteins induce HR cell death in the dicots *N. benthamiana* and *N. tabacum*<sup>32,60</sup>. Moreover, animal  
462 and bacterial TIRs display NADase activity, produce immune-related small molecules, and can  
463 activate HR cell death in plants (*Nicotiana*)<sup>60,61</sup>. Conversely, plant TIR domains exhibit conserved  
464 NADase activity in *Escherichia coli* similar to prokaryotic TIRs<sup>60,62</sup>. Our functional interrogation of  
465 TIR domains from non-flowering plants and streptophyte algae further confirms wide functional  
466 conservation. Intriguingly, this occurs even though seed-free plants lack EDS1, the central  
467 regulator of TIR activity in flowering plants<sup>63</sup>. A recent study demonstrated that EDS1 is not  
468 required for the activity of a monocot (maize) TNP-family TIR domain in *Nicotiana*<sup>32</sup>. Given that  
469 TNPs and TNLs originate in lineages lacking EDS1, it is likely that EDS1-independent immune  
470 responses arose early in the evolution of plants and algae. Further research exploiting non-  
471 flowering model systems enriched with TIRs (mosses) is likely to provide novel insights into the  
472 diversification of TIR-mediated immune mechanisms in plants.

473  
474 Molecular genetic NLR research has historically focused on a limited group of angiosperm crops  
475 and model systems. Here, we took a comparative macroevolutionary approach to broaden our  
476 functional understanding of the NLR landscape in diverse plant lineages. We identified  
477 functionally conserved TIR and CC N-terminal domains spanning the spectrum of plant evolution.  
478 Our first look into CC functionality in the divergent model *M. polymorpha* revealed similarities with  
479 the angiosperm *N. benthamiana* despite over 450 million years of divergence between each  
480 system. Together, this suggests that NLRs are a core component of the plant immune system.  
481 While TIR and CC-type NLRs are likely to retain the functions of their angiosperm counterparts,  
482 non-flowering lineages harbor an untapped diversity of atypical NLRs with novel N-terminal

483 executioner domains (hydrolases and kinases), C-terminal repeats, and integrated domains. This  
484 extended set of plant NLRs therefore provides exciting potential to discover novel mechanisms of  
485 plant disease resistance and to further dissect the fundamental aspects of immune receptor form  
486 and function. Indeed, conceptually similar studies exploring NLR-like proteins of bacteria are  
487 beginning to uncover such novelties<sup>64</sup>. Future studies aimed at exploiting the diverse receptor  
488 repertoires of plants and algae are therefore likely to advance our fundamental understanding of  
489 NLR-mediated immunity and may ultimately inform efforts to engineer novel disease resistance  
490 mechanisms in crops.

491

## 492 **ACKNOWLEDGMENTS**

493 We thank Takayuki Kochi (Kyoto University, Japan) for providing pMpGWB168; Sebastian  
494 Schornack (Sainsbury Laboratory University of Cambridge, U.K.) and Tolga Bozkurt (Imperial  
495 College London, U.K.) for commenting on an earlier draft of the manuscript; our colleagues at the  
496 Joint Genome Institute for access to *Ceratodon*, *Ceratopteris*, *Physcomitrium*, and *Selaginella*  
497 genomic information ([https:// phytozome.jgi.doe.gov](https://phytozome.jgi.doe.gov)); Adeline Harant and Mauricio Contreras for  
498 technical support; Kristina Grenz, Kayla Robinson, Hyeonmin Jeong, Max Jordan, and all former  
499 members of the Carella group for additional technical and critical support. We thank the  
500 Department of Energy Joint Genome Institute, Jonathan Shaw (Duke University), and David  
501 Westin (ORNL) for pre-publication access to the proteomes of *Sphagnum fallax* and  
502 *S. magellanicum* that we used for NLR prediction. We also thank Michal Lorenc, Jiyuan Yan, and  
503 Peter Waterhouse (Queensland University of Technology, Australia) for pre-publication access to  
504 the *N. benthamiana* v3.5 draft genome (these sequence data were produced by the Nicotiana  
505 benthamiana Sequencing Consortium). This work was supported by the UKRI Biotechnology and  
506 Biological Sciences Research Council (BBSRC; grants BB/P012574, BBS/E/J/000PR9798,  
507 BBS/E/J/000PR9797, BBS/E/J/000PR9796, BBS/E/J/000PR9795) and the Gatsby Charitable  
508 Foundation.

509

## 510 **AUTHOR CONTRIBUTIONS**

511 K.S.C., J.K., S.K., and P.C. designed research; K.S.C., and P.C. performed research; K.S.C., J.K.,  
512 T.S., M.V, and P.C. analyzed data; K.S.C and P.C. prepared all figures and final datasets; P.C.  
513 wrote the paper with contributions from all authors.

514

## 515 **DECLARATION OF INTERESTS**

516 S.K. receives funding from industry on NLR biology. S.K. has filed patents on NLR biology.

517

## 518 **FIGURE LEGENDS**

519

### 520 **Figure 1. Major plant lineages harbor a diversity of NLR immune receptors**

521 **(A)** Graphical representation of the evolutionary history of major plant lineages that includes  
522 streptophyte algae (Al), liverworts (Lv), mosses (Ms), hornworts (Hr), lycophytes (Ly),  
523 monilophytes (Mn), gymnosperms (Gy), and angiosperms (An). The indicated transitions  
524 represent a timescale of millions of years ago (mya) based on previous estimates<sup>29</sup>. Not to scale.

525 **(B)** Total number of full-length NLRs (NLR), degenerated NLRs (Deg), or other NB-ARC domain-  
526 containing proteins predicted by the NLRtracker annotation tool. Numbers on the graph represent  
527 the total number of full-length NLRs predicted per species/group.  
528 **(C)** Diversity of NB-ARC domain subtypes per species/group as predicted by NLRtracker.  
529 **(D)** Diversity of NLR receptor subtypes per species/group as predicted by NLRtracker. Categories  
530 are based on predicted N-terminal executioner domains and include TIR-type (TIR), CC-type  
531 (CC), RPW8-type (CC<sub>R</sub>), CblN-type (CC<sub>CblN</sub>), hydrolase-type (Hyd), protein kinase-type (Pkn), and  
532 undefined/minimal NB-ARC-LRR type receptors (NL).  
533 **(E)** Total number of NLR immune receptor integrated domains (NLR-IDs) predicted per  
534 species/group by NLR tracker.

535

### 536 **Figure 2. NLRs with diverse N-terminal executioner domains share deep evolutionary** 537 **ancestry**

538 **(A)** Schematic overview of canonical NLR immune receptor structure including the N-terminal  
539 executioner domain (NTD), the central NB-ARC regulatory domain, and C-terminal leucine rich  
540 repeats (LRR) or other repeats. Arrows indicate the bioinformatic analyses being conducted on  
541 each protein domain.  
542 **(B)** Frequency of key NLR N-terminal domain orthogroups (OG) observed per lineage/group.  
543 Where appropriate, representative angiosperm NLRs are listed above the respective OG.  
544 **(C)** Maximum likelihood phylogeny of diverse plant NLRs based on the central NB-ARC regulatory  
545 domain. Coloration of the outer ring represents host lineage/group while branch colors indicate  
546 key N-terminal domain OGs. A representative angiosperm TIR-NLR (RPS4), CC-NLR (ZAR1),  
547 and CC<sub>RPW8</sub>-NLR (ADR1) are indicated.

548

### 549 **Figure 3. Widely distributed N-terminal executioner domains are functionally conserved** 550 **across major plant lineages**

551 **(A)** Schematic overview of the experimental design, whereby diverse TIR and CC domains are  
552 fused to eYFP, transiently expressed in *Nicotiana*, and scored for their ability to induce immune  
553 related hypersensitive response (HR) cell death via the HR index (from 0-7). Examples of  
554 macroscopic cell death phenotypes in an *N. benthamiana* leaf are depicted.  
555 **(B)** HR cell death induction of TIR-eYFP fusions transiently expressed in *N. benthamiana* leaves.  
556 Scoring (HR index) was performed 5 days post agroinfiltration, Data from for three independent  
557 experimental replicates are shown (n ≥ 9 infiltrations per replicate).  
558 **(C)** HR cell death induction of CC/RPW8-eYFP fusions transiently expressed in *N. benthamiana*  
559 leaves. Scoring (HR index) was performed 5 days post agroinfiltration. Data from three  
560 independent experimental replicates are shown (n ≥ 9 infiltrations per replicate).

561

### 562 **Figure 4. The sequence conserved MAEPL motif is essential for CC<sub>OG3</sub> domain activity and** 563 **is functionally analogous to the angiosperm MADA motif**

564 **(A)** Schematic representation of a CC<sub>OG3</sub>-NLR immune receptor. The location of the MAEPL motif  
565 on the CC domain is indicated by an arrow and the consensus amino acid sequence of the motif  
566 is illustrated using WebLogo (<https://weblogo.berkeley.edu/logo.cgi>).  
567 **(B)** Hidden Markov model (HMM) profiling of the N-terminal MAEPL and MADA motifs in non-  
568 flowering NLR immune receptors identified in this study (non-flowering) relative to the angiosperm

569 NLR atlas<sup>31</sup> (angiosperms). Mean motif scores are indicated on each graph by a numerical value  
570 and a dotted line.

571 **(C)** Amino acid sequence alignment of MAEPL and MADA motifs in representative CC domains.  
572 Conserved residues are indicated by an asterisk (\*) above the alignment, similar residues by dots.  
573 For non-flowering NLRs, gene symbols correspond to MpCNL1 (Mp3g09150), MppCNL1  
574 (MppBR5\_0611s0010.1), CrCNL1 (Ceric.01G123500.1.p), and ScCNL1  
575 (Sacu\_v1.1\_s0074.g017289).

576 **(D)** Macroscopic HR cell death phenotypes of CC<sub>OG3</sub>-eYFP fusions comparing wild-type domains  
577 (WT), N-terminal MAEPL truncations ( $\Delta$ N), and L-to-E MAEPL variants (MpCNL1<sup>L16/17E</sup>/2E;  
578 MppCNL1<sup>L8/16/17E</sup>/3E; CrCNL1<sup>L10/18/19E</sup>/3E) transiently expressed in *N. benthamiana*. Images were  
579 obtained 5 days post agroinfiltration and are representative of 3 independent experiments.

580 **(E)** Quantification of HR cell death caused by CC<sub>OG3</sub>-eYFP (WT), N-terminal truncations ( $\Delta$ N), and  
581 L-to-E variants (2E/3E) for MpCNL1, MppCNL1, and CrCNL1 domains. Cell death was scored  
582 (HR index) 5 days post agroinfiltration. Data from three independent experimental replicates are  
583 shown ( $n \geq 9$  infiltrations per replicate).

584 **(F)** Graphical representation of the MADA-to-MAEPL N-terminal motif swapping experimental  
585 design. An autoactive variant of MADA-CC-NLR NbNRC4<sup>D478</sup> is used as a scaffold to assess N-  
586 terminal motif competency in *N. benthamiana*.

587 **(G)** HR cell death induction of NbNRC4<sup>D478V</sup>-6HA chimeras transiently expressed in *N.*  
588 *benthamiana*. N-terminal motif chimeras were generated using motifs belonging to the indicated  
589 receptors. The presence of a MAEPL motif is indicated (+/-). Cell death was scored (HR index) 5  
590 days post agroinfiltration. Data from three independent experimental replicates are shown ( $n \geq 9$   
591 infiltrations per replicate).

592

593 **Figure 5. MAEPL-CC<sub>OG3</sub> activates an immune-like response in the liverwort *Marchantia***  
594 ***polymorpha***

595 **(A)** Macroscopic phenotypes of *Marchantia* transgenic lines XVE:mCitrine-HA (mCit-HA),  
596 XVE:MpCNL1<sup>CC</sup>-eYFP (MpC1, line 1), or the N-terminally truncated XVE:MpCNL1<sup>CC $\Delta$ N</sup>-eYFP  
597 (MpC1 $\Delta$ N, line 3) grown on estradiol (20  $\mu$ M) or DMSO (0.1%) control media. Images are  
598 representative of growth phenotypes observed in 3 experimental replicates ( $n = 8$  plants) at 4 days  
599 post plating. Scale bar = 2 mm.

600 **(B)** Macroscopic phenotypes of *Marchantia* transgenic lines XVE:mCitrine-HA (mCit-HA),  
601 XVE:MpCNL1<sup>CC</sup>-eYFP (MpC1, line 1), or XVE:MpCNL1<sup>CC $\Delta$ N</sup>-eYFP (MpC1 $\Delta$ N, line 3) 1 day post  
602 vacuum infiltration with estradiol (50  $\mu$ M) or DMSO (0.25% in water). Images are representative  
603 of phenotypes observed in 3 or more experimental replicates ( $n \geq 8$  plants). An arrow indicates  
604 tissue darkening at the apical notch of MpC1 liverworts. Scale bar = 2 mm.

605 **(C)** Conductivity ( $\mu$ S cm<sup>-1</sup>) of *Marchantia* thalli treated with estradiol (50  $\mu$ M) or DMSO (0.25%) at  
606 4, 24, and 48 hours post infiltration (hpi). Statistically significant differences are denoted by an  
607 asterisk (\*  $p < 0.05$ , Student's t-test). Error bars represent standard deviation of the mean. Data  
608 from three independent experimental replicates is presented ( $n = 12$  plants per experiment).

609 **(D)** Confocal fluorescence microscopy shows the localization of MpC1-eYFP and MpC1 $\Delta$ N-eYFP  
610 alongside a myristolated-mScarlet (myr-mScarlet) membrane marker in *Marchantia polymorpha*.  
611 Images were acquired 24 hours post estradiol treatment (20  $\mu$ M) in MpC1-eYFP/myr-mScarlet  
612 (XVE:MpCNL1<sup>CC</sup>-eYFP/MpEF1a:myr-mScarlet) and MpC1 $\Delta$ N-eYFP/myr-mScarlet

613 (XVE:MpCNL1<sup>CCAN</sup>-eYFP/MpEF1a:myr-mScarlet) transgenic lines . Plastid autofluorescence is  
614 false-colored in cyan. Scale bars = 10  $\mu$ m. Images are representative of 3 experimental replicates.

615

616

617 **Figure 6. CC<sub>OG3</sub> activates conserved immune-like transcriptional responses in flowering**  
618 **and non-flowering plants**

619 **(A)** Hierarchical clustering of significantly differentially expressed genes in mCit-HA  
620 (XVE:mCitrine-HA), MpC1 (XVE:MpCNL1<sup>CC</sup>-eYFP, line 1), and MpC1 $\Delta$  (XVE:MpCNL1<sup>CCAN</sup>-  
621 eYFP, line 3) *M. polymorpha* transgenics 24 hours after vacuum infiltration with 20  $\mu$ M estradiol  
622 (adjusted p-value < 10<sup>-3</sup>, log fold change (|LFC|  $\geq$  2). Variance-stabilized row-centered counts are  
623 shown.

624 **(B)** Total number of differentially expressed genes (DEGs) shared between *M. polymorpha* MpC1  
625 and MpC1 $\Delta$  transgenic lines. Differential expression is based on comparisons to the mCit-HA  
626 control.

627 **(C)** Hierarchical clustering of significantly differentially expressed genes in *N. benthamiana* leaves  
628 transiently expressing GY (GUS-YFP), MpC1 (MpCNL1<sup>CC</sup>-eYFP), MpC1 $\Delta$  (MpCNL1<sup>CCAN</sup>-eYFP),  
629 or the angiosperm CC domain of MLA10 (MLA10<sup>CC</sup>-eYFP) at 24 hours post agroinfiltration  
630 (adjusted p-value < 10<sup>-3</sup>, log fold change (|LFC|  $\geq$  2). Variance-stabilized row-centered counts are  
631 shown.

632 **(D)** Total number of differentially expressed genes (DEGs) shared in *N. benthamiana* leaves  
633 transiently expressing MLA10, MpC1, or MpC1 $\Delta$ . Differential expression is based on comparisons  
634 to the GUS-YFP control treatment.

635 **(E)** Orthology analysis of *Marchantia* and *Nicotiana* MpCNL1<sup>CC</sup>-eYFP transcriptomes.  
636 Orthologous genes belonging to single or multi-copy orthogroups having an adjusted p-value <  
637 10<sup>-3</sup> and log fold change (LFC)  $\geq$  2 or  $\leq$  -2 were considered. Numbers of DEGs per sector and  
638 functional enrichment categories are indicated.

639

640 **METHODS**

641 **Plant Growth Details**

642 *Marchantia polymorpha* (TAK1 background) were cultivated axenically from gemmae and grown  
643 under a long day photoperiod (16 hours of light;  $\sim$ 80  $\mu$ E light intensity) on one-half-strength MS  
644 (Murashige and Skoog) media (pH 6.7) with B5 vitamins at 20-22  $^{\circ}$ C. *Nicotiana benthamiana* were  
645 grown in soil under controlled conditions with a temperature of 22  $^{\circ}$ C and a long day photoperiod  
646 (16 hours of light;  $\sim$ 160-200  $\mu$ E light intensity).

647

648 **Confocal Microscopy**

649 For experiments using *M. polymorpha*, confocal laser scanning microscopy was performed on a  
650 Leica TCS SP8 equipped with HyD detectors. A white light laser was used to visualize eYFP  
651 (excitation 515 nm) and mScarlet (excitation 570 nm). For experiments using *N. benthamiana*,  
652 confocal microscopy was performed on a Zeiss LSM880. Argon Ion (457 / 488 / 514 nm) and  
653 HeNe lasers (594nm) were used to visualize eYFP (excitation 515 nm) and RFP (excitation 594  
654 nm). We collected images from at least three independent plants per experimental replicate. All  
655 experiments were performed at least three times with similar results.

656

## 657 **Trypan blue staining**

658 Trypan blue staining was performed on liverworts using the protocol described in Redkar et al.  
659 (2022)<sup>54</sup>. In our conditions, the differential staining of stressed-vs-control liverworts was  
660 particularly difficult to discern since apical notches are easily stained and estradiol induction of  
661 CC activity led to tissue darkening and phenolic deposits in this area. Tissue clearing (chloral  
662 hydrate) of unstained liverworts verified this pattern. Trypan blue staining of heat-killed liverworts  
663 and *N. benthamiana* leaves undergoing CC-eYFP-induced HR confirmed the viability of I staining  
664 solutions. For *N. benthamiana*, trypan blue staining was performed as described in Ma et al.  
665 (2012)<sup>42</sup>.

666

## 667 **Transient Agrobacterium-mediated expression and cell death assays**

668 Transient expression of all constructs in *Nicotiana* were performed by agroinfiltration according to  
669 methods described in Adachi et al. (2019)<sup>34</sup>. Briefly, four weeks old *Nicotiana* plants were  
670 infiltrated with *Agrobacterium tumefaciens* GV3101 carrying binary expression plasmids. *A.*  
671 *tumefaciens* suspensions were prepared in fresh infiltration buffer (10 mM MES-KOH, 10 mM  
672 MgCl<sub>2</sub>, and 150 mM acetosyringone, pH5.6) and adjusted to OD<sub>600</sub> = 0.25 that were then mixed  
673 in a 1:1 ratio with an *A. tumefaciens* carrying the p19 silencing suppressor. HR cell death  
674 phenotypes were scored on an HR index ranging from 0 (no visible symptoms) to 7 (fully confluent  
675 cell death).

676

## 677 **Estradiol-induction and ion leakage assays**

678 Estradiol-inducible gene expression in *Marchantia* was achieved by vacuum infiltration generated  
679 within the cavity of a needless 50 mL syringe. A 20 mM stock of estradiol (in 100% DMSO) was  
680 used to prepare a 50 or 20 µM working concentration (in water). For mock-treatment controls, we  
681 used a comparable 0.25% or 0.1% DMSO solution (in water). To minimize damage caused by  
682 tissue handling, all liverworts used for infiltrations were grown on nylon mesh (Normesh, UK),  
683 which allowed easy transfer of liverwort thalli to the syringe for treatment. Once infiltrated, thalli  
684 were subsequently transferred to clean petri dishes containing at least 2 layers of pre-wetted filter  
685 paper. Plates were sealed with micropore tape and returned to the appropriate growing condition.  
686 Where indicated, estradiol treatment was also performed by culturing liverwort gemmae directly  
687 into solid media supplemented with estradiol (20 µM) or DMSO (0.1%). Ion leakage assays were  
688 performed essentially as described in Hatsugai and Katagiri (2018)<sup>43</sup>. Measurements were  
689 performed after 4, 24 and 48 hours post-harvest with a compact conductivity meter (LAQUAtwin-  
690 EC-33, Horiba Scientific). Five leaf discs (4mm diameter) were harvested from different thallus  
691 and immerse inside 2ml ddH<sub>2</sub>O as one biological replicate. Each measurement contains three  
692 biological replicates and all experiments were performed at least three times.

693

## 694 **RNA Isolation, cDNA Synthesis, and qRT-PCR Analysis**

695 Total RNA was extracted from flash-frozen *M. polymorpha* (TAK1) plants that were collected 24  
696 hours post mock (0.1% DMSO in water) or estradiol (20 µM) treatment using the Spectrum Plant  
697 RNA Extraction Kit (Protocol A) with on-column DNase treatment following the manufacturer's  
698 instructions. cDNA was synthesized using 2 µg of total RNA with SuperScript II reverse  
699 transcriptase (Invitrogen) following the manufacturer's instructions. qRT-PCR reactions were  
700 performed in a total volume of 10 µL using 2.5 µL of 10x-diluted (in nuclease-free water) cDNA  
701 and Roche SYBR mix with the primers listed in Data S6. The qRT-PCR reaction protocol



702 consisted of an initial denaturation at 95 °C for 5 minutes followed by 40 cycles of 95 °C for 10  
703 seconds, 60 °C for 15 seconds, and 72 °C 15 seconds on a Roche LightCycler 480 II according  
704 to manufacturer's instructions. All qRT primers were designed using Primer3<sup>65,66</sup> or were  
705 previously published as listed in Data S6. Specificity was validated by analyzing melt curves after  
706 each run. Three independent sample replicates as well as three technical replicated per sample  
707 were performed at any given time point/treatment. Calculations of expression levels normalized  
708 to internal controls and statistical analyses (ANOVA, Tukey's HSD) were performed using R  
709 software and all graphs were generated in GraphPad Prism (v9.3.1).

710

### 711 **Cloning and Marchantia transformation**

712 NbNRC4 chimera constructs were amplified by PCR with primers containing BsaI cloning sites,  
713 the appropriate N-terminal motif, and overlapping NbNRC4<sup>D478V</sup> sequences using a NbNRC4<sup>D478V</sup>-  
714 6HA construct<sup>34</sup> as a template (Data S6). To generate NLR N-terminal domain (CC and TIR) eYFP  
715 fusion constructs, we synthesized codon optimized domains flanked by BsaI restriction sites  
716 (Azenta). Synthesized gene fragments, or the  $\beta$ -glucuronidase (GUS) control (Addgene #50332),  
717 were assembled with pICH85281 [mannopine synthase promoter+W (MasWpro), Addgene  
718 no.50272], pICSL50005 (YFP, TSL SynBio), pICSL60008 [Arabidopsis heat shock protein  
719 terminator (HSPter), TSL SynBio] and the binary vector pICH47742 (Addgene no. 48001) in a  
720 Golden Gate compatible system. To generate Marchantia expression vectors, the MpCNL1  
721 (Mp3g01950,1-266aa) and MpCNL1 $\Delta$ N (Mp3g01950,31-266aa) were cloned by PCR (Q5 High  
722 Fidelity Polymerase, NEB) with attL-containing primers using codon optimized gene fragments as  
723 a template. mCitrine-HA and myr-mScarlet were amplified from template plasmids containing the  
724 respective fluorophore; mCitrine/pMpGWB105 (Addgene # 68559) and mScarlet:CETN2<sup>67</sup>. To  
725 generate fluorophore fusions, we used a multi-step PCR approach with overlapping primers to  
726 generate an HA tag on the C-terminal end of mCitrine, or a myristolation sequence at the N-  
727 terminus of mScarlet. Amplicons were flanked by attB sites to enable recombination into  
728 pDONR221 using BP Clonase II (Invitrogen) following manufacturer instructions. MpCNL1<sup>CC</sup>-  
729 eYFP, MpCNL1<sup>CC $\Delta$ N</sup>-eYFP and mCitrine-HA inducible expression constructs were generated by  
730 LR recombination reactions into pMpGWB168 (XVE::GW)<sup>39</sup>. The plasma-membrane marker  
731 construct MpEF1a:myr-mScarlet was generated by LR recombination into pMpGWB303  
732 (Addgene no. 68631)<sup>68</sup>. All resulting constructs were transformed into *Agrobacterium tumefaciens*  
733 GV3101 (pMP90) by electroporation. *M. polymorpha* transformation was performed using the  
734 *Agrobacterium*-mediated thallus regeneration method<sup>69</sup> in the TAK1 background. Transformants  
735 were selected on solid one-half strength MS-B5 media supplemented with cefotaxime (125  
736  $\mu$ g/mL) and hygromycin B (15 - 25  $\mu$ g/mL) or chlorsulfuron (0.5 - 1  $\mu$ M). Stable transgenic plants  
737 were obtained by propagating gemmae from T1 thalli. All experiments were performed in the G2  
738 (second asexual/gemmae generation) or subsequent generations.

739

### 740 **Protein immunoblotting**

741 Protein samples were prepared from four tissue discs (8 mm diameter) sampled from *N.*  
742 *benthiana* leaves at 1 day or 2 days after agroinfiltration and were homogenized in 100  $\mu$ L of  
743 2X SDS loading buffer (0.1 M Tris-HCl, 0.2 M DTT, 4.0% [w/v] SDS, 3mM Bromophenol blue, 2  
744 M Glycerol). Protein samples from *Marchantia* were prepared from five tissue discs (4mm  
745 diameter) with 50  $\mu$ L of 2X SDS loading buffer. Immunoblotting was performed with HA-probe (F-  
746 7) HRP (sc-7392 HRP, Santa Cruz Biotech, 1:5000 dilution) or primary anti-GFP antibody

747 (11814460001, Roche, 1:2500 dilution) combined with secondary HRP-linked Anti-mouse IgG  
748 (NXA931-1ML, Amersham, 1:5000 dilution). Total protein loading was visualized by staining  
749 nitrocellulose membranes with Ponceau S solution (Sigma-Aldrich, P7170).

750

### 751 **Library preparation and sequencing**

752 mRNA from *M. polymorpha* transgenics 24 hours post estradiol-treatment or *N. benthamiana*  
753 leaves 24 hours post agroinfiltration were purified from DNase-treated total RNA (prepared as  
754 described above) using Poly(A) selection and then fragmented (at least 3 independently treated  
755 plants collected per sample replicate). cDNA library preparation was performed with the TruSeq®  
756 RNA Sample Preparation Kit (Illumina, US) according to manufacturer's instructions. Sequencing  
757 of each sample (in triplicate) was performed on the Illumina NovaSeq in 150 paired end mode.  
758 De-multiplexed samples were used for subsequent analyses. All raw fastq data are accessible at  
759 <http://www.ncbi.nlm.nih.gov/sra> under the accession number PRJNA881591.

760

### 761 **Expression analysis**

762 We first analyzed raw sequencing reads with FastQC for quality control  
763 (<https://www.bioinformatics.babraham.ac.uk/projects/fastqc/>). Reads were then aligned back to  
764 the appropriate genome (*Marchantia polymorpha* v5.1 -  
765 <https://marchantia.info/download/tak1v5.1/>; *Nicotiana benthamiana* draft genome v3.5 -  
766 <https://www.nbenth.com/>) using HiSAT2<sup>70</sup>. We used featureCounts<sup>71</sup> to obtain raw counts using  
767 only uniquely mapped and properly paired reads. Differentially expressed genes were identified  
768 with DESeq2<sup>72</sup> following pair-wise comparisons between controls (mCitrine-HA control for  
769 *Marchantia* experiments; GUS-YFP control for *N. benthamiana* experiments) and the indicated  
770 treatment conditions. We focused only on differentially expressed genes with a strict cut-off  
771 (absolute LFC [log<sub>2</sub> fold change] ≥ 2 and adjusted p-value ≤ 10<sup>-3</sup>) when performing hierarchical  
772 clustering of samples. Heatmaps were generated with R pheatmap using variance-stabilised  
773 counts median-centered by gene. Functional enrichment analyses were performed using the  
774 MBEX online tool (<https://marchantia.info/mbex/>)<sup>73</sup> with a significance cutoff of FDR (False  
775 Discovery Rate) ≤ 0.05.

776

### 777 **NLR prediction, phylogenetics, orthology, and protein sequence analyses**

778 We used NLRtracker to identify and annotate NLRs in the genome annotations listed in Data S1  
779 (sheet 1). For phylogenetic analysis, we first generated amino acid sequence alignments using  
780 only the NB-ARC domains of predicted NLRs using MAFFT<sup>74</sup>. After trimming the alignment with  
781 trimAl<sup>75</sup>, we used IQ-TREE (v2.0.3)<sup>76</sup> to perform maximum likelihood phylogenetic analysis with  
782 bootstrapping (1000 Uboot + SH-aLRT). The ModelFinder option identified 'JTT+F+G4' as the  
783 optimal substitution model for our dataset. All subsequent tree rendering was performed using  
784 iTOL, and a public tree with extended annotation options can be found online  
785 (<https://itol.embl.de/shared/philcarella>).

786

787 We used OrthoFinder (OrthoFinder-2.5.4)<sup>45</sup> to reconstruct orthologous protein groups  
788 (orthogroups) shared between organisms. For orthology analysis of NLR N-terminal domains we  
789 considered any protein sequence upstream of the NB-ARC domain as a putative N-terminal  
790 domain and performed OrthoFinder on de-duplicated sequences. For comparative

791 transcriptomics, we performed OrthoFinder on the proteomes (primary protein isoforms only) of  
792 *M. polymorpha* and *N. benthamiana*. Visualization of differentially expressed orthologs was  
793 performed using GraphPad Prism9 software. Single-copy orthologs were compared 1-to-1,  
794 whereas multi-copy orthologs were compared 1-to-many or many-to-1 (i.e. the same *Marchantia*  
795 value may be compared to multiple *Nicotiana* values and *vice versa*).

796  
797 To identify conserved amino acid motifs in OG3-type CCs, we subjected an amino acid sequence  
798 alignment of CC<sub>OG3</sub> domain sequences to MEME analysis<sup>33</sup> with the parameters 'zero or one  
799 occurrence per sequence, top ten motifs'. MEME detected the N-terminal MAEPL motif in several  
800 CC<sub>OG3</sub> domains, therefore we curated a more specific alignment containing these N-terminal  
801 sequences to build a hidden Markov model (HMM) profile of the non-flowering 'MAEPL' motif  
802 using the 'hmmbuild' function in HMMER (version 3.3.2)<sup>35</sup>. Upon calibration with 'hmmcalibrate',  
803 we tested the MAEPL.hmm profile in the proteomes of major plant lineage representatives listed  
804 in Data S1. We further compared the MAEPL.hmm with the angiosperm MADA.hmm profile<sup>34</sup> in  
805 two representative angiosperm proteomes; *A. thaliana* (TAIR10, <https://www.arabidopsis.org/>)  
806 and *S. lycopersicum* (ITAG4.1, [https://solgenomics.net/organism/Solanum\\_lycopersicum/genome](https://solgenomics.net/organism/Solanum_lycopersicum/genome)) and in the angiosperm NLR  
807 atlas (<https://biobigdata.nju.edu.cn/ANNA/>)<sup>31</sup>. All motif scans were performed using the following  
808 template line of code 'hmmsearch --max -o output.txt Motif.hmm Proteome.fasta'.  
809

810  
811 Supporting files and raw data related to NLR prediction, NB-ARC phylogenetic analysis, N-  
812 terminal domain orthology, N-terminal domain structural prediction, and HMM profiling are  
813 deposited at Zenodo doi: 10.5281/zenodo.7092643.

814  
815 **Statistics**  
816 Statistical details of experiments can be found in the corresponding figure legends. Here, the  
817 identity of the statistical tests used, the exact value of n (i.e. number of independently infected  
818 liverworts) and dispersion and precision measures are given (error bars represent mean +/-  
819 standard deviation, p-value cutoffs, etc.). All statistical analyses for transcriptomic and proteomic  
820 analyses are described in the methods details above. Statistical analysis of qRT-PCR expression  
821 data are described in figure legends and were performed using R. Student's t-tests were  
822 performed in Microsoft Excel or GraphPad Prism.

823  
824

## 825 SUPPLEMENTARY INFORMATION

826  
827 **Figure S1. Predicted structures of NLR N-terminal executioner domains**

828  
829 **Figure S2. MAEPL motif occurrence across major plant lineages**

830  
831 **Figure S3. Subcellular localization of MAEPL-CC<sub>OG3</sub> in *Nicotiana* and *Marchantia***

832  
833 **Figure S4. Characterization of the MAEPL-CC<sub>OG3</sub> response in *Marchantia***

834

835 **Figure S5. Transcriptomic analysis of CC<sub>OG3</sub> activity in *Marchantia* and *Nicotiana***

836

837 **Data S1. NLR prediction and orthology analysis**

838 Data related to **Figure 1** and **Figure 2**. Includes a full list of queried genomes (sheet 1),  
839 characterization of NLRs identified through NLR tracker (sheets 2-4), and N-terminal domain  
840 orthology analysis (sheet 5).

841

842 **Data S2. Cell death phenotypes of NLR N-terminal executioner domains in *Nicotiana***

843 Data related to **Figure 3** and **Figure 4**. Macroscopic HR cell death phenotypes (A) indicative of  
844 the HR cell death index, (B) TIR-eYFP fusions in *N. benthamiana*, (C) TIR-eYFP fusions in *N.*  
845 *tabacum*, (D) CC-eYFP and CC<sub>RPW8</sub>-eYFP fusions in *N. benthamiana*, (E) MAEPL CC N-terminal  
846 truncation-eYFP fusions in *N. benthamiana*, (F) MAEPL L-to-E variant-eYFP fusions in *N.*  
847 *benthamiana*, and (G) MADA/MAEPL NbNRC4-6HA chimeras in *N. benthamiana*.

848

849 **Data S3. Protein immunoblotting**

850 Data related to **Figure 3**, **Figure 4**, **Figure 5**, **Figure S3** and **Figure S4**. Protein immunoblots of  
851 (A) TIR/CC-eYFP fusions expressed in *N. benthamiana*, (B) MADA/MAEPL NbNRC4-6HA fusions  
852 in *N. benthamiana*, (C) MAEPL truncation/variant-eYFP fusions in *N. benthamiana*, and (D)  
853 *Marchantia* XVE transgenic lines.

854

855 **Data S4. MAEPL motif discovery**

856 Informatics data related to **Figure 4** and **Figure S2**. Support for MAEPL discovery through (A)  
857 MEME motif identification, (B) MEME motif location, (C) MAEPL motif amino acid sequence  
858 alignment in OG3-type CCs, and (D) MAEPL/MADA comparison through amino acid sequence  
859 alignment.

860

861 **Data S5. RNA-sequencing analysis of CC<sub>OG3</sub> activity in *Marchantia* and *Nicotiana***

862 Transcriptomics data related to **Figure 6** and **Figure S6**. For sheets (1-2;4-6): significantly  
863 differentially expressed genes during CC induction (adjusted p-value < 10<sup>-3</sup>, log fold change (|LFC|  
864 ≥ 2), variance-stabilized row-centered counts are shown.

865

866 **Data S6. Oligonucleotide primers and synthetic gene fragments used in this study**

867

868 **REFERENCES**

- 869 1. van Wersch, S., Tian, L., Hoy, R., and Li, X. (2020). Plant NLRs: The Whistleblowers of  
870 Plant Immunity. *Plant Communications* 1, 100016. [10.1016/j.xplc.2019.100016](https://doi.org/10.1016/j.xplc.2019.100016).
- 871 2. Kourelis, J., and van der Hoorn, R.A.L. (2018). Defended to the Nines: 25 Years of  
872 Resistance Gene Cloning Identifies Nine Mechanisms for R Protein Function. *Plant Cell* 30,  
873 285–299. [10.1105/tpc.17.00579](https://doi.org/10.1105/tpc.17.00579).
- 874 3. Andolfo, G., Donato, A.D., Chiaiese, P., Natale, A.D., Pollio, A., Jones, J.D.G., Frusciante,  
875 L., and Ercolano, M.R. (2019). Alien domains shaped the modular structure of plant NLR  
876 proteins. *Genome Biology and Evolution*, evz248. [10.1093/gbe/evz248](https://doi.org/10.1093/gbe/evz248).
- 877 4. Gao, Y., Wang, W., Zhang, T., Gong, Z., Zhao, H., and Han, G.-Z. (2018). Out of Water:  
878 The Origin and Early Diversification of Plant R -Genes. *Plant Physiol.* 177, 82–89.  
879 [10.1104/pp.18.00185](https://doi.org/10.1104/pp.18.00185).

- 880 5. Lapin, D., Johanndrees, O., Wu, Z., Li, X., and Parker, J.E. (2022). Molecular innovations in  
881 plant TIR-based immunity signaling. *The Plant Cell* 34, 1479–1496. 10.1093/plcell/koac035.
- 882 6. Sarris, P.F., Cevik, V., Dagdas, G., Jones, J.D.G., and Krasileva, K.V. (2016). Comparative  
883 analysis of plant immune receptor architectures uncovers host proteins likely targeted by  
884 pathogens. *BMC Biology* 14. 10.1186/s12915-016-0228-7.
- 885 7. Kim, Y.K., Shin, J.-S., and Nahm, M.H. (2016). NOD-Like Receptors in Infection, Immunity,  
886 and Diseases. *Yonsei Med J* 57, 5. 10.3349/ymj.2016.57.1.5.
- 887 8. Kourelis, J., Sakai, T., Adachi, H., and Kamoun, S. (2021). RefPlantNLR is a comprehensive  
888 collection of experimentally validated plant disease resistance proteins from the NLR family.  
889 *PLoS Biol* 19, e3001124. 10.1371/journal.pbio.3001124.
- 890 9. Lechtenberg, B.C., Mace, P.D., and Riedl, S.J. (2014). Structural mechanisms in NLR  
891 inflammasome signaling. *Current Opinion in Structural Biology* 29, 17–25.  
892 10.1016/j.sbi.2014.08.011.
- 893 10. Lee, H., Mang, H., Choi, E., Seo, Y., Kim, M., Oh, S., Kim, S., and Choi, D. (2021).  
894 Genome-wide functional analysis of hot pepper immune receptors reveals an autonomous  
895 NLR clade in seed plants. *New Phytol* 229, 532–547. 10.1111/nph.16878.
- 896 11. Bernoux, M., Ve, T., Williams, S., Warren, C., Hatters, D., Valkov, E., Zhang, X., Ellis, J.G.,  
897 Kobe, B., and Dodds, P.N. (2011). Structural and Functional Analysis of a Plant Resistance  
898 Protein TIR Domain Reveals Interfaces for Self-Association, Signaling, and Autoregulation.  
899 *Cell Host & Microbe* 9, 200–211. 10.1016/j.chom.2011.02.009.
- 900 12. Bentham, A.R., Zdrzałek, R., De la Concepcion, J.C., and Banfield, M.J. (2018). Uncoiling  
901 CNLs: Structure/function approaches to understanding CC domain function in plant NLRs.  
902 *Plant and Cell Physiology*. 10.1093/pcp/pcy185.
- 903 13. Lolle, S., Stevens, D., and Coaker, G. (2020). Plant NLR-triggered immunity: from receptor  
904 activation to downstream signaling. *Current Opinion in Immunology* 62, 99–105.  
905 10.1016/j.coi.2019.12.007.
- 906 14. Dalio, R.J.D., Paschoal, D., Arena, G.D., Magalhães, D.M., Oliveira, T.S., Merfa, M.V.,  
907 Maximo, H.J., and Machado, M.A. (2021). Hypersensitive response: From NLR pathogen  
908 recognition to cell death response. *Ann Appl Biol* 178, 268–280. 10.1111/aab.12657.
- 909 15. Wang, J., Wang, J., Hu, M., Wu, S., Qi, J., Wang, G., Han, Z., Qi, Y., Gao, N., Wang, H.-W.,  
910 et al. (2019). Ligand-triggered allosteric ADP release primes a plant NLR complex. *Science*  
911 364, eaav5868. 10.1126/science.aav5868.
- 912 16. Wang, J., Hu, M., Wang, J., Qi, J., Han, Z., Wang, G., Qi, Y., Wang, H.-W., Zhou, J.-M., and  
913 Chai, J. (2019). Reconstitution and structure of a plant NLR resistosome conferring  
914 immunity. *Science* 364, eaav5870. 10.1126/science.aav5870.
- 915 17. Bi, G., Su, M., Li, N., Liang, Y., Dang, S., Xu, J., Hu, M., Wang, J., Zou, M., Deng, Y., et al.  
916 (2021). The ZAR1 resistosome is a calcium-permeable channel triggering plant immune  
917 signaling. *Cell* 184, 3528–3541.e12. 10.1016/j.cell.2021.05.003.
- 918 18. Förderer, A., Li, E., Lawson, A.W., Deng, Y., Sun, Y., Logemann, E., Zhang, X., Wen, J.,  
919 Han, Z., Chang, J., et al. (2022). A wheat resistosome defines common principles of  
920 immune receptor channels. *Nature*. 10.1038/s41586-022-05231-w.
- 921 19. Jacob, P., Kim, N.H., Wu, F., El-Kasbi, F., Chi, Y., Walton, W.G., Furzer, O.J., Lietzan,  
922 A.D., Sunil, S., Kempthorn, K., et al. (2021). Plant “helper” immune receptors are Ca<sup>2+</sup> -  
923 permeable nonselective cation channels. *Science* 373, 420–425. 10.1126/science.abg7917.
- 924 20. Ma, S., Lapin, D., Liu, L., Sun, Y., Song, W., Zhang, X., Logemann, E., Yu, D., Wang, J.,  
925 Jirschitzka, J., et al. (2020). Direct pathogen-induced assembly of an NLR immune receptor  
926 complex to form a holoenzyme. *Science* 370, eabe3069. 10.1126/science.abe3069.
- 927 21. Martin, R., Qi, T., Zhang, H., Liu, F., King, M., Toth, C., Nogales, E., and Staskawicz, B.J.  
928 (2020). Structure of the activated ROQ1 resistosome directly recognizing the pathogen  
929 effector XopQ. *Science* 370, eabd9993. 10.1126/science.abd9993.

- 930 22. Jia, A., Huang, S., Song, W., Wang, J., Meng, Y., Sun, Y., Xu, L., Laessle, H., Jirschitzka,  
931 J., Hou, J., et al. (2022). TIR-catalyzed ADP-ribosylation reactions produce signaling  
932 molecules for plant immunity. *Science*, eabq8180. 10.1126/science.abq8180.
- 933 23. Huang, S., Jia, A., Song, W., Hessler, G., Meng, Y., Sun, Y., Xu, L., Laessle, H., Jirschitzka,  
934 J., Ma, S., et al. (2022). Identification and receptor mechanism of TIR-catalyzed small  
935 molecules in plant immunity. *Science*, eabq3297. 10.1126/science.abq3297.
- 936 24. Wu, Z., Li, M., Dong, O.X., Xia, S., Liang, W., Bao, Y., Wasteneys, G., and Li, X. (2019).  
937 Differential regulation of TNL-mediated immune signaling by redundant helper CNLs. *New*  
938 *Phytol* 222, 938–953. 10.1111/nph.15665.
- 939 25. Adachi, H., Derevnina, L., and Kamoun, S. (2019). NLR singletons, pairs, and networks:  
940 evolution, assembly, and regulation of the intracellular immunoreceptor circuitry of plants.  
941 *Current Opinion in Plant Biology* 50, 121–131. 10.1016/j.pbi.2019.04.007.
- 942 26. Van Der Biezen, E.A., and Jones, J.D.G. (1998). Plant disease-resistance proteins and the  
943 gene-for-gene concept. *Trends in Biochemical Sciences* 23, 454–456. 10.1016/S0968-  
944 0004(98)01311-5.
- 945 27. van der Hoorn, R.A.L., and Kamoun, S. (2008). From Guard to Decoy: A New Model for  
946 Perception of Plant Pathogen Effectors. *Plant Cell* 20, 2009–2017. 10.1105/tpc.108.060194.
- 947 28. Li, H.-T., Yi, T.-S., Gao, L.-M., Ma, P.-F., Zhang, T., Yang, J.-B., Gitzendanner, M.A.,  
948 Fritsch, P.W., Cai, J., Luo, Y., et al. (2019). Origin of angiosperms and the puzzle of the  
949 Jurassic gap. *Nature Plants* 5, 461–470. 10.1038/s41477-019-0421-0.
- 950 29. Morris, J.L., Puttick, M.N., Clark, J.W., Edwards, D., Kenrick, P., Pressel, S., Wellman, C.H.,  
951 Yang, Z., Schneider, H., and Donoghue, P.C.J. (2018). The timescale of early land plant  
952 evolution. *Proceedings of the National Academy of Sciences* 115, E2274–E2283.  
953 10.1073/pnas.1719588115.
- 954 30. Shao, Z.-Q., Xue, J.-Y., Wang, Q., Wang, B., and Chen, J.-Q. (2019). Revisiting the Origin  
955 of Plant NBS-LRR Genes. *Trends in Plant Science* 24, 9–12. 10.1016/j.tplants.2018.10.015.
- 956 31. Liu, Y., Zeng, Z., Zhang, Y.-M., Li, Q., Jiang, X.-M., Jiang, Z., Tang, J.-H., Chen, D., Wang,  
957 Q., Chen, J.-Q., et al. (2021). An angiosperm NLR Atlas reveals that NLR gene reduction is  
958 associated with ecological specialization and signal transduction component deletion.  
959 *Molecular Plant* 14, 2015–2031. 10.1016/j.molp.2021.08.001.
- 960 32. Johannndrees, O., Baggs, E.L., Uhlmann, C., Locci, F., Läßle, H.L., Melkonian, K., Käufer,  
961 K., Dongus, J.A., Nakagami, H., Krasileva, K.V., et al. (2022). Variation in plant  
962 Toll/Interleukin-1 receptor domain protein dependence on *ENHANCED DISEASE*  
963 *SUSCEPTIBILITY 1*. *Plant Physiology*, kiac480. 10.1093/plphys/kiac480.
- 964 33. Bailey, T.L., and Elkan, C. (1994). Fitting a mixture model by expectation maximization to  
965 discover motifs in biopolymers. *Proc Int Conf Intell Syst Mol Biol* 2, 28–36.
- 966 34. Adachi, H., Contreras, M.P., Harant, A., Wu, C., Derevnina, L., Sakai, T., Duggan, C.,  
967 Moratto, E., Bozkurt, T.O., Maqbool, A., et al. (2019). An N-terminal motif in NLR immune  
968 receptors is functionally conserved across distantly related plant species. *eLife* 8, e49956.  
969 10.7554/eLife.49956.
- 970 35. Eddy, S.R. (1998). Profile hidden Markov models. *Bioinformatics* 14, 755–763.  
971 10.1093/bioinformatics/14.9.755.
- 972 36. Contreras, M.P., Pai, H., Tumtas, Y., Duggan, C., Him Yuen, E.L., Cruces, A.V., Kourelis, J.,  
973 Ahn, H.-K., Wu, C.-H., Bozkurt, T.O., et al. (2022). Sensor NLR immune proteins activate  
974 oligomerization of their NRC helper (Plant Biology) 10.1101/2022.04.25.489342.
- 975 37. Duggan, C., Moratto, E., Savage, Z., Hamilton, E., Adachi, H., Wu, C.-H., Leary, A.Y.,  
976 Tumtas, Y., Rothery, S.M., Maqbool, A., et al. (2021). Dynamic localization of a helper NLR  
977 at the plant–pathogen interface underpins pathogen recognition. *Proc. Natl. Acad. Sci.*  
978 *U.S.A.* 118, e2104997118. 10.1073/pnas.2104997118.
- 979 38. Bowman, J.L., Arteaga-Vazquez, M., Berger, F., Briginshaw, L.N., Carella, P., Aguilar-Cruz,  
980 A., Davies, K.M., Dierschke, T., Dolan, L., Dorantes-Acosta, A.E., et al. (2022). The

- 981 renaissance and enlightenment of *Marchantia* as a model system. *The Plant Cell* 34, 3512–  
982 3542. [10.1093/plcell/koac219](https://doi.org/10.1093/plcell/koac219).
- 983 39. Furuya, T., Nishihama, R., Ishizaki, K., Kohchi, T., Fukuda, H., and Kondo, Y. (2022). A  
984 glycogen synthase kinase 3-like kinase MpGSK regulates cell differentiation in *Marchantia*  
985 *polymorpha*. *Plant Biotechnology* 39, 65–72. [10.5511/plantbiotechnology.21.1219a](https://doi.org/10.5511/plantbiotechnology.21.1219a).
- 986 40. Carella, P., Gogleva, A., Hoey, D.J., Bridgen, A.J., Stolze, S.C., Nakagami, H., and  
987 Schornack, S. (2019). Conserved Biochemical Defenses Underpin Host Responses to  
988 Oomycete Infection in an Early-Divergent Land Plant Lineage. *Current Biology* 29, 2282–  
989 2294.e5. [10.1016/j.cub.2019.05.078](https://doi.org/10.1016/j.cub.2019.05.078).
- 990 41. Albert, N.W., Thrimawithana, A.H., McGhie, T.K., Clayton, W.A., Deroles, S.C., Schwinn,  
991 K.E., Bowman, J.L., Jordan, B.R., and Davies, K.M. (2018). Genetic analysis of the liverwort  
992 *Marchantia polymorpha* reveals that R2R3MYB activation of flavonoid production in  
993 response to abiotic stress is an ancient character in land plants. *New Phytologist* 218, 554–  
994 566. [10.1111/nph.15002](https://doi.org/10.1111/nph.15002).
- 995 42. Ma, L., Lukasik, E., Gawehns, F., and Takken, F.L.W. (2012). The Use of Agroinfiltration for  
996 Transient Expression of Plant Resistance and Fungal Effector Proteins in *Nicotiana*  
997 *benthamiana* Leaves. In *Plant Fungal Pathogens Methods in Molecular Biology.*, M. D.  
998 Bolton and B. P. H. J. Thomma, eds. (Humana Press), pp. 61–74. [10.1007/978-1-61779-  
999 501-5\\_4](https://doi.org/10.1007/978-1-61779-501-5_4).
- 1000 43. Hatsugai, N., and Katagiri, F. (2018). Quantification of Plant Cell Death by Electrolyte  
1001 Leakage Assay. *BIO-PROTOCOL* 8. [10.21769/BioProtoc.2758](https://doi.org/10.21769/BioProtoc.2758).
- 1002 44. van Wersch, R., Li, X., and Zhang, Y. (2016). Mighty Dwarfs: Arabidopsis Autoimmune  
1003 Mutants and Their Usages in Genetic Dissection of Plant Immunity. *Front. Plant Sci.* 7.  
1004 [10.3389/fpls.2016.01717](https://doi.org/10.3389/fpls.2016.01717).
- 1005 45. Emms, D.M., and Kelly, S. (2019). OrthoFinder: phylogenetic orthology inference for  
1006 comparative genomics. *Genome Biol* 20, 238. [10.1186/s13059-019-1832-y](https://doi.org/10.1186/s13059-019-1832-y).
- 1007 46. Daskalov, A. (2016). On the evolutionary trajectories of signal-transducing amyloids in fungi  
1008 and beyond. *Prion* 10, 362–368. [10.1080/19336896.2016.1228506](https://doi.org/10.1080/19336896.2016.1228506).
- 1009 47. Hildebrand, J.M., Tanzer, M.C., Lucet, I.S., Young, S.N., Spall, S.K., Sharma, P., Pierotti,  
1010 C., Garnier, J.-M., Dobson, R.C.J., Webb, A.I., et al. (2014). Activation of the pseudokinase  
1011 MLKL unleashes the four-helix bundle domain to induce membrane localization and  
1012 necroptotic cell death. *Proc. Natl. Acad. Sci. U.S.A.* 111, 15072–15077.  
1013 [10.1073/pnas.1408987111](https://doi.org/10.1073/pnas.1408987111).
- 1014 48. Barragan, C.A., Wu, R., Kim, S.-T., Xi, W., Habring, A., Hagmann, J., Van de Weyer, A.-L.,  
1015 Zaidem, M., Ho, W.W.H., Wang, G., et al. (2019). RPW8/HR repeats control NLR activation  
1016 in *Arabidopsis thaliana*. *PLoS Genet* 15, e1008313. [10.1371/journal.pgen.1008313](https://doi.org/10.1371/journal.pgen.1008313).
- 1017 49. Maekawa, T., Kashkar, H., and Coll, N.S. (2022). Dying in self-defence: a comparative  
1018 overview of immunogenic cell death signalling in animals and plants. *Cell Death Differ.*  
1019 [10.1038/s41418-022-01060-6](https://doi.org/10.1038/s41418-022-01060-6).
- 1020 50. Grund, E., Tremousaygue, D., and Deslandes, L. (2019). Plant NLRs with Integrated  
1021 Domains: Unity Makes Strength. *Plant Physiol.* 179, 1227–1235. [10.1104/pp.18.01134](https://doi.org/10.1104/pp.18.01134).
- 1022 51. Clayton, W.A., Albert, N.W., Thrimawithana, A.H., McGhie, T.K., Deroles, S.C., Schwinn,  
1023 K.E., Warren, B.A., McLachlan, A.R.G., Bowman, J.L., Jordan, B.R., et al. (2018). UVR8-  
1024 mediated induction of flavonoid biosynthesis for UVB tolerance is conserved between the  
1025 liverwort *Marchantia polymorpha* and flowering plants. *The Plant Journal* 96, 503–517.  
1026 [10.1111/tpj.14044](https://doi.org/10.1111/tpj.14044).
- 1027 52. Nelson, J.M., Hauser, D.A., Hinson, R., and Shaw, A.J. (2018). A novel experimental  
1028 system using the liverwort *Marchantia polymorpha* and its fungal endophytes reveals  
1029 diverse and context-dependent effects. *New Phytologist* 218, 1217–1232.  
1030 [10.1111/nph.15012](https://doi.org/10.1111/nph.15012).

- 1031 53. Ponce de León, I., and Montesano, M. (2013). Activation of Defense Mechanisms against  
1032 Pathogens in Mosses and Flowering Plants. *IJMS* 14, 3178–3200. 10.3390/ijms14023178.
- 1033 54. Redkar, A., Gimenez Ibanez, S., Sabale, M., Zechmann, B., Solano, R., and Di Pietro, A.  
1034 (2022). *Marchantia polymorpha* model reveals conserved infection mechanisms in the  
1035 vascular wilt fungal pathogen *Fusarium oxysporum*. *New Phytologist* 234, 227–241.  
1036 10.1111/nph.17909.
- 1037 55. Ryu, S., Holzschuh, J., Erhardt, S., Ettl, A.-K., and Driever, W. (2005). Depletion of  
1038 minichromosome maintenance protein 5 in the zebrafish retina causes cell-cycle defect and  
1039 apoptosis. *Proc. Natl. Acad. Sci. U.S.A.* 102, 18467–18472. 10.1073/pnas.0506187102.
- 1040 56. Yang, Y., Ma, S., Ye, Z., and Zhou, X. (2020). MCM7 silencing promotes cutaneous  
1041 melanoma cell autophagy and apoptosis by inactivating the AKT1/mTOR signaling pathway.  
1042 *J Cell Biochem* 121, 1283–1294. 10.1002/jcb.29361.
- 1043 57. Herridge, R.P., Day, R.C., and Macknight, R.C. (2014). The role of the MCM2-7 helicase  
1044 complex during Arabidopsis seed development. *Plant Mol Biol* 86, 69–84. 10.1007/s11103-  
1045 014-0213-x.
- 1046 58. Holding, D.R., and Springer, P.S. (2002). The Arabidopsis gene PROLIFERA is required for  
1047 proper cytokinesis during seed development. *Planta* 214, 373–382. 10.1007/s00425-001-  
1048 0686-0.
- 1049 59. Rodriguez, E., Chevalier, J., El Ghouli, H., Voldum-Clausen, K., Mundy, J., and Petersen, M.  
1050 (2018). DNA damage as a consequence of NLR activation. *PLoS Genet* 14, e1007235.  
1051 10.1371/journal.pgen.1007235.
- 1052 60. Wan, L., Essuman, K., Anderson, R.G., Sasaki, Y., Monteiro, F., Chung, E.-H., Osborne  
1053 Nishimura, E., DiAntonio, A., Milbrandt, J., Dangl, J.L., et al. (2019). TIR domains of plant  
1054 immune receptors are NAD<sup>+</sup>-cleaving enzymes that promote cell death. *Science* 365, 799–  
1055 803. 10.1126/science.aax1771.
- 1056 61. Bayless, A.M., Chen, S., Ogden, S.C., Xu, X., Sidda, J.D., Manik, M.K., Li, S., Kobe, B., Ve,  
1057 T., Song, L., et al. (2022). Plant and prokaryotic TIR domains generate distinct cyclic ADPR  
1058 NADase products (*Plant Biology*) 10.1101/2022.09.19.508568.
- 1059 62. Ofir, G., Herbst, E., Baroz, M., Cohen, D., Millman, A., Doron, S., Tal, N., Malheiro, D.B.A.,  
1060 Malitsky, S., Amitai, G., et al. (2021). Antiviral activity of bacterial TIR domains via immune  
1061 signalling molecules. *Nature* 600, 116–120. 10.1038/s41586-021-04098-7.
- 1062 63. Lapin, D., Bhandari, D.D., and Parker, J.E. (2020). Origins and Immunity Networking  
1063 Functions of EDS1 Family Proteins. *Annu. Rev. Phytopathol.* 58, 253–276.  
1064 10.1146/annurev-phyto-010820-012840.
- 1065 64. Gao, L.A., Wilkinson, M.E., Strecker, J., Makarova, K.S., Macrae, R.K., Koonin, E.V., and  
1066 Zhang, F. (2022). Prokaryotic innate immunity through pattern recognition of conserved viral  
1067 proteins. *Science* 377, eabm4096. 10.1126/science.abm4096.
- 1068 65. Koressaar, T., and Remm, M. (2007). Enhancements and modifications of primer design  
1069 program Primer3. *Bioinformatics* 23, 1289–1291. 10.1093/bioinformatics/btm091.
- 1070 66. Untergasser, A., Cutcutache, I., Koressaar, T., Ye, J., Faircloth, B.C., Remm, M., and  
1071 Rozen, S.G. (2012). Primer3—new capabilities and interfaces. *Nucleic Acids Research* 40,  
1072 e115–e115. 10.1093/nar/gks596.
- 1073 67. Evangelisti, E., Shenhav, L., Yunusov, T., Le Naour-Vernet, M., Rink, P., and Schornack, S.  
1074 (2019). Hydrodynamic Shape Changes Underpin Nuclear Rerouting in Branched Hyphae of  
1075 an Oomycete Pathogen. *mBio* 10, e01516-19. 10.1128/mBio.01516-19.
- 1076 68. Ishizaki, K., Nishihama, R., Ueda, M., Inoue, K., Ishida, S., Nishimura, Y., Shikanai, T., and  
1077 Kohchi, T. (2015). Development of Gateway Binary Vector Series with Four Different  
1078 Selection Markers for the Liverwort *Marchantia polymorpha*. *PLOS ONE* 10, e0138876.  
1079 10.1371/journal.pone.0138876.



- 1080 69. Kubota, A., Ishizaki, K., Hosaka, M., and Kohchi, T. (2013). Efficient *Agrobacterium* -  
1081 Mediated Transformation of the Liverwort *Marchantia polymorpha* Using Regenerating  
1082 Thalli. *Bioscience, Biotechnology, and Biochemistry* 77, 167–172. 10.1271/bbb.120700.
- 1083 70. Kim, D., Paggi, J.M., Park, C., Bennett, C., and Salzberg, S.L. (2019). Graph-based genome  
1084 alignment and genotyping with HISAT2 and HISAT-genotype. *Nat Biotechnol* 37, 907–915.  
1085 10.1038/s41587-019-0201-4.
- 1086 71. Liao, Y., Smyth, G.K., and Shi, W. (2014). featureCounts: an efficient general purpose  
1087 program for assigning sequence reads to genomic features. *Bioinformatics* 30, 923–930.  
1088 10.1093/bioinformatics/btt656.
- 1089 72. Love, M.I., Huber, W., and Anders, S. (2014). Moderated estimation of fold change and  
1090 dispersion for RNA-seq data with DESeq2. *Genome Biology* 15. 10.1186/s13059-014-0550-  
1091 8.
- 1092 73. Kawamura, S., Romani, F., Yagura, M., Mochizuki, T., Sakamoto, M., Yamaoka, S.,  
1093 Nishihama, R., Nakamura, Y., Yamato, K.T., Bowman, J.L., et al. (2022). MarpolBase  
1094 Expression: A Web-based, Comprehensive Platform for Visualization and Analysis of  
1095 Transcriptomes in the Liverwort *Marchantia polymorpha*. *Plant and Cell Physiology*,  
1096 pcac129. 10.1093/pcp/pcac129.
- 1097 74. Katoh, K., and Standley, D.M. (2013). MAFFT Multiple Sequence Alignment Software  
1098 Version 7: Improvements in Performance and Usability. *Molecular Biology and Evolution* 30,  
1099 772–780. 10.1093/molbev/mst010.
- 1100 75. Capella-Gutierrez, S., Silla-Martinez, J.M., and Gabaldon, T. (2009). trimAl: a tool for  
1101 automated alignment trimming in large-scale phylogenetic analyses. *Bioinformatics* 25,  
1102 1972–1973. 10.1093/bioinformatics/btp348.
- 1103 76. Minh, B.Q., Schmidt, H.A., Chernomor, O., Schrempf, D., Woodhams, M.D., von Haeseler,  
1104 A., and Lanfear, R. (2020). IQ-TREE 2: New Models and Efficient Methods for Phylogenetic  
1105 Inference in the Genomic Era. *Molecular Biology and Evolution* 37, 1530–1534.  
1106 10.1093/molbev/msaa015.
- 1107

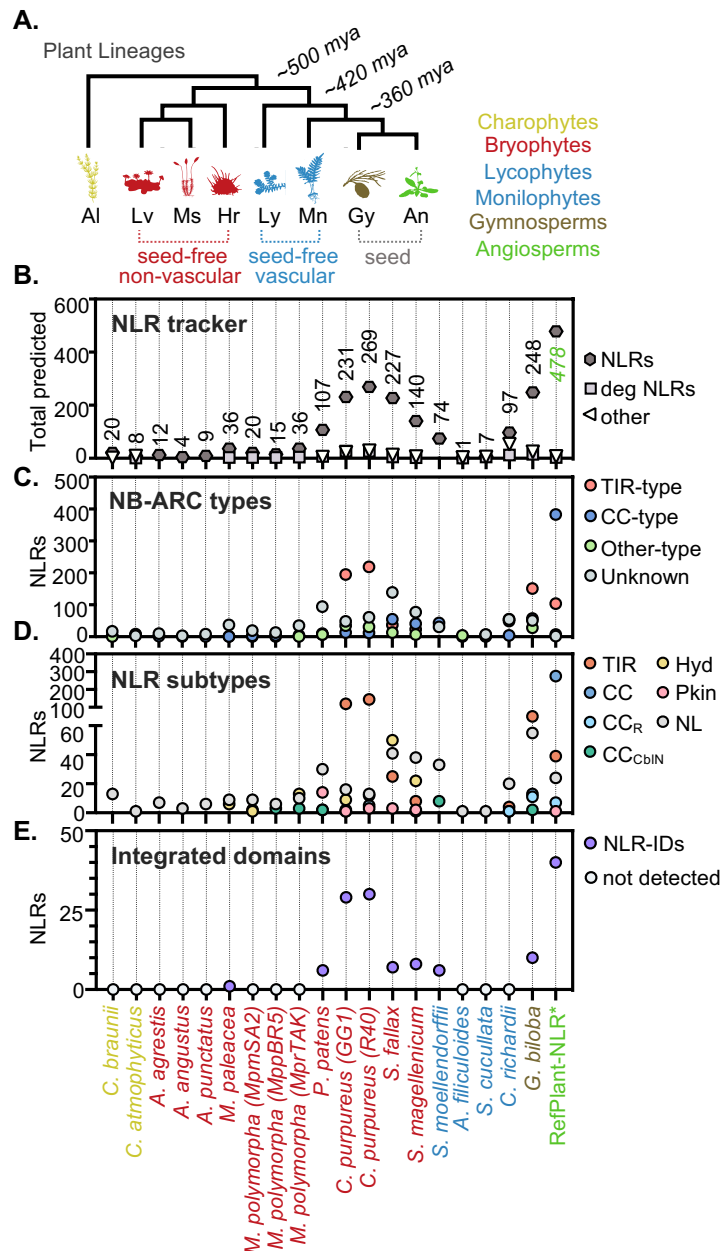

**Figure 1. Major plant lineages harbor a diversity of NLR immune receptors**

**(A)** Graphical representation of the evolutionary history of major plant lineages that includes streptophyte algae (Al), liverworts (Lv), mosses (Ms), hornworts (Hr), lycophytes (Ly), monilophytes (Mn), gymnosperms (Gy), and angiosperms (An). The indicated transitions represent a timescale of millions of years ago (mya) based on previous estimates<sup>29</sup>. Not to scale.

**(B)** Total number of full-length NLRs (NLR), degenerated NLRs (Deg), or other NB-ARC domain-containing proteins predicted by the NLRtracker annotation tool. Numbers on the graph represent the total number of full-length NLRs predicted per species/group.

**(C)** Diversity of NB-ARC domain subtypes per species/group as predicted by NLRtracker.

**(D)** Diversity of NLR receptor subtypes per species/group as predicted by NLRtracker. Categories are based on predicted N-terminal executioner domains and include TIR-type (TIR), CC-type (CC), RPW8-type (CC<sub>R</sub>), CbIN-type (CC<sub>CbIN</sub>), hydrolase-type (Hyd), protein kinase-type (Pkn), and undefined/minimal NB-ARC-LRR type receptors (NL).

**(E)** Total number of NLR immune receptor integrated domains (NLR-IDs) predicted per species/group by NLR tracker.

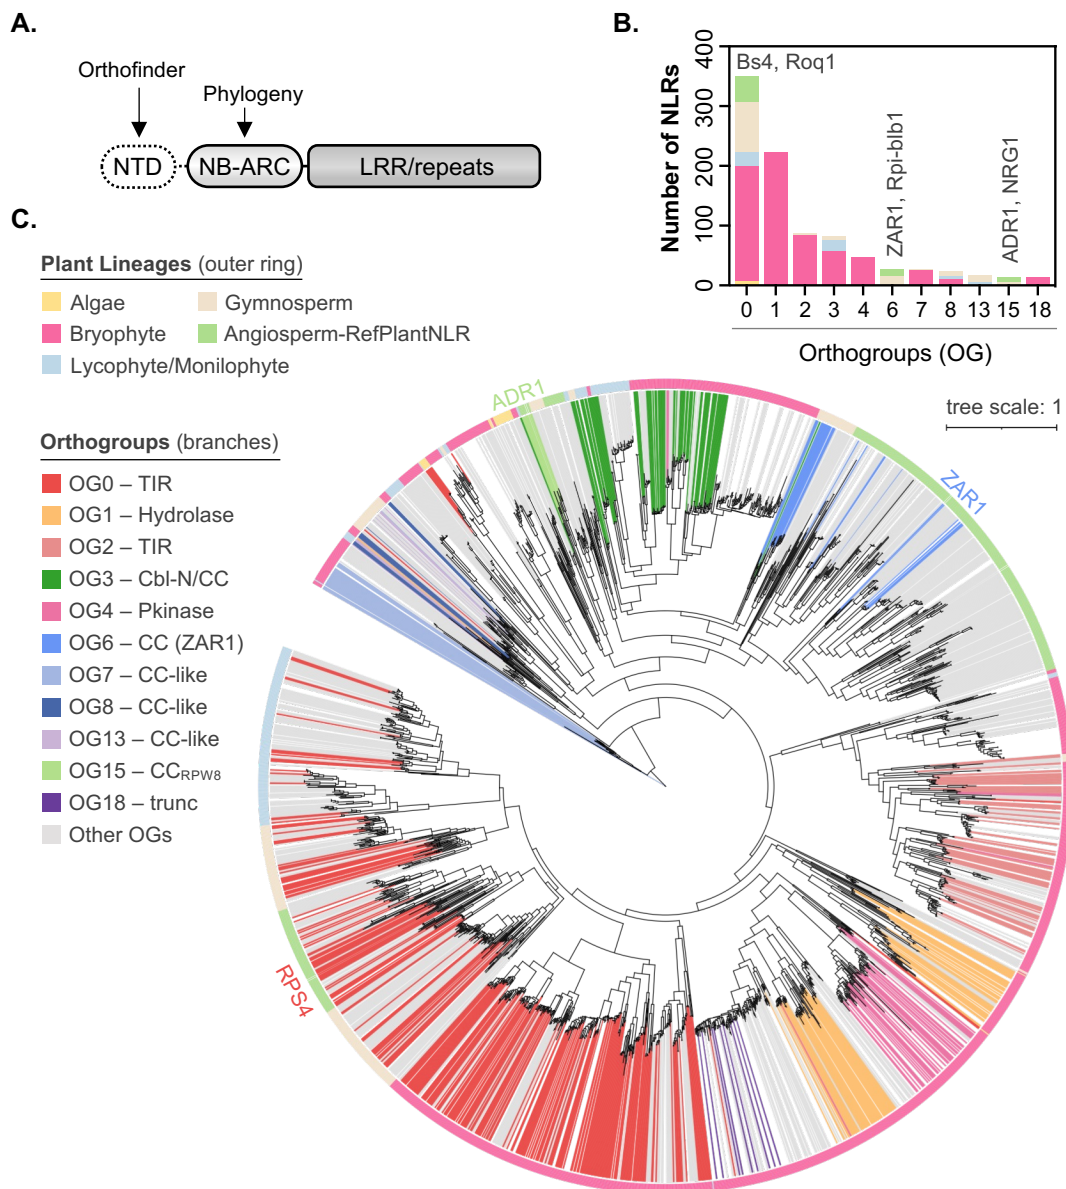

**Figure 2. NLRs with diverse N-terminal executioner domains share deep evolutionary ancestry**

**(A)** Schematic overview of canonical NLR immune receptor structure including the N-terminal executioner domain (NTD), the central NB-ARC regulatory domain, and C-terminal leucine rich repeats (LRR) or other repeats. Arrows indicate the bioinformatic analyses being conducted on each protein domain.

**(B)** Frequency of key NLR N-terminal domain orthogroups (OG) observed per lineage/group. Where appropriate, representative angiosperm NLRs are listed above the respective OG.

**(C)** Maximum likelihood phylogeny of diverse plant NLRs based on the central NB-ARC regulatory domain. Coloration of the outer ring represents host lineage/group while branch colors indicate key N-terminal domain OGs. A representative angiosperm TIR-NLR (RPS4), CC-NLR (ZAR1), and CC<sub>RPW8</sub>-NLR (ADR1) are indicated.

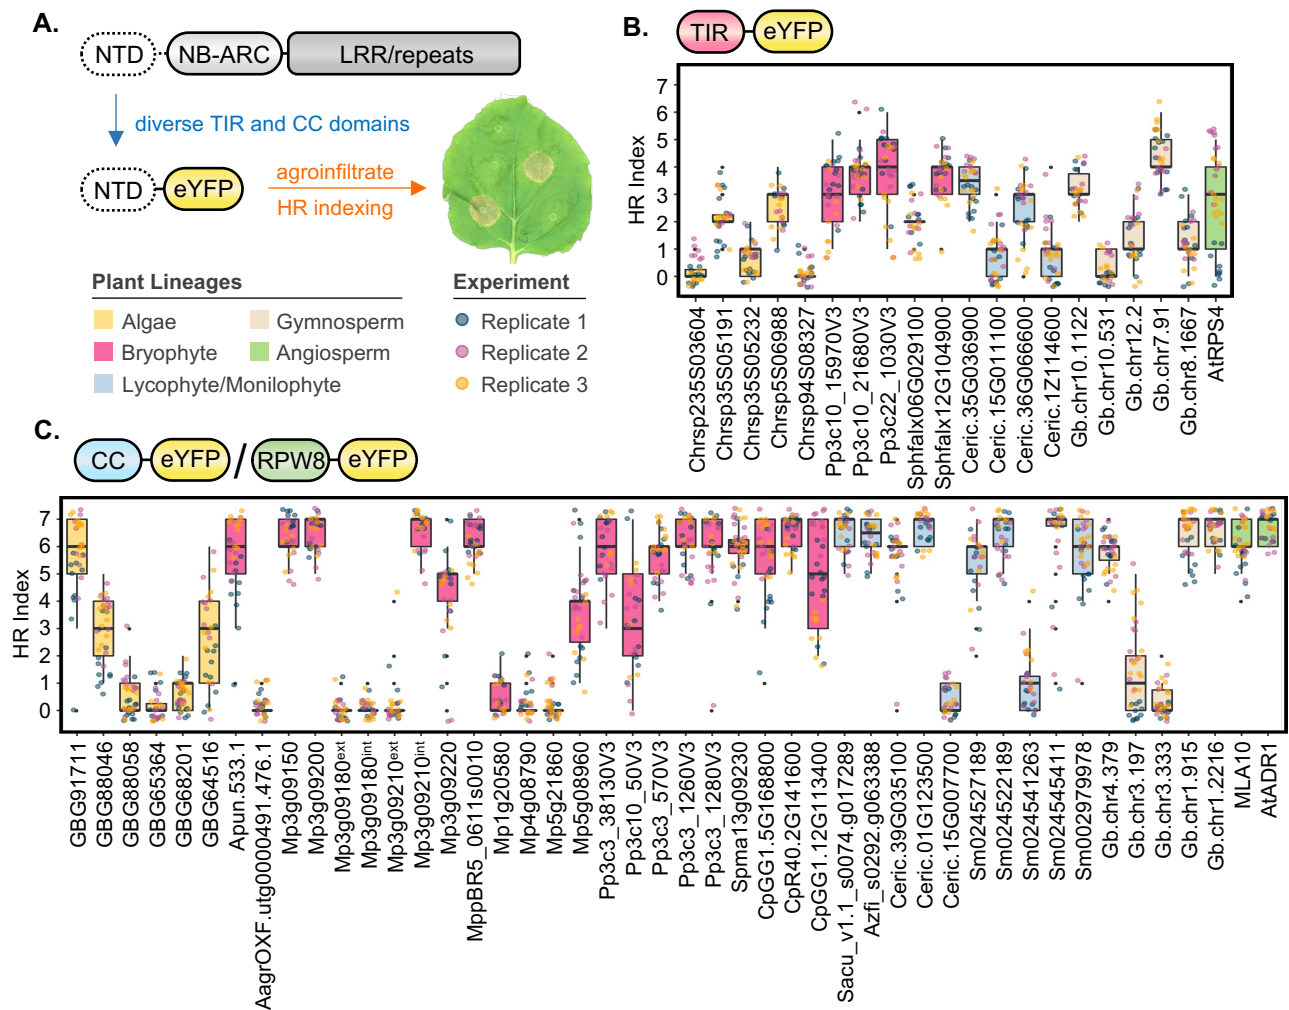

**Figure 3. Widely distributed N-terminal executioner domains are functionally conserved across major plant lineages**

**(A)** Schematic overview of the experimental design, whereby diverse TIR and CC domains are fused to eYFP, transiently expressed in *Nicotiana*, and scored for their ability to induce immune related hypersensitive response (HR) cell death via the HR index (from 0-7). Examples of macroscopic cell death phenotypes in an *N. benthamiana* leaf are depicted.

**(B)** HR cell death induction of TIR-eYFP fusions transiently expressed in *N. benthamiana* leaves. Scoring (HR index) was performed 5 days post agroinfiltration. Data from three independent experimental replicates are shown ( $n \geq 9$  infiltrations per replicate).

**(C)** HR cell death induction of CC/RPW8-eYFP fusions transiently expressed in *N. benthamiana* leaves. Scoring (HR index) was performed 5 days post agroinfiltration. Data from three independent experimental replicates are shown ( $n \geq 9$  infiltrations per replicate).

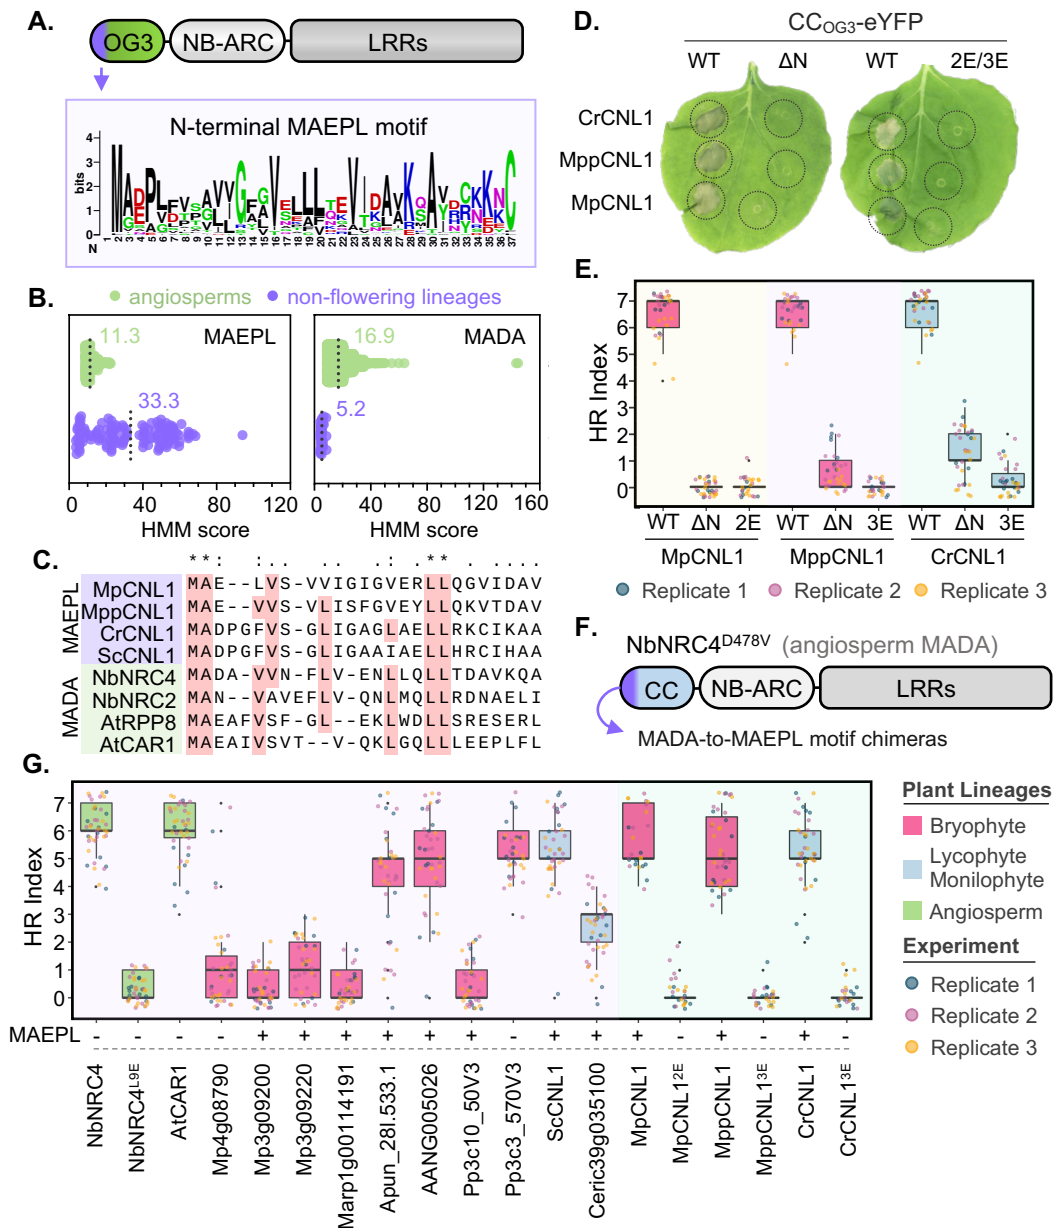

**Figure 4. The sequence conserved MAEPL motif is essential for CC<sub>OG3</sub> domain activity and is functionally analogous to the angiosperm MADA motif**

**(A)** Schematic representation of a CC<sub>OG3</sub>-NLR immune receptor. The location of the MAEPL motif on the CC domain is indicated by an arrow and the consensus amino acid sequence of the motif is illustrated using WebLogo (<https://weblogo.berkeley.edu/logo.cgi>).

**(B)** Hidden Markov model (HMM) profiling of the N-terminal MAEPL and MADA motifs in non-flowering NLR immune receptors identified in this study (non-flowering) relative to the angiosperm NLR atlas<sup>31</sup> (angiosperms). Mean motif scores are indicated on each graph by a numerical value and a dotted line.

**(C)** Amino acid sequence alignment of MAEPL and MADA motifs in representative CC domains. Conserved residues are indicated by an asterisk (\*) above the alignment, similar residues by dots. For non-flowering NLRs, gene symbols correspond to MpCnL1 (Mp3g09150), MppCnL1 (MppBR5\_0611s0010.1), CrCnL1 (Ceric.01G123500.1.p), and ScCnL1 (Sacu\_v1.1\_s0074.g017289).

**(D)** Macroscopic HR cell death phenotypes of CC<sub>OG3</sub>-eYFP fusions comparing wild-type domains (WT), N-terminal MAEPL truncations (ΔN), and L-to-E MAEPL variants (MpCnL1<sup>L16/17E/2E</sup>; MppCnL1<sup>L8/16/17E/3E</sup>; CrCnL1<sup>L10/18/19E/3E</sup>) transiently expressed in *N. benthamiana*. Images were obtained 5 days post agroinfiltration and are representative of 3 independent experiments.

**(E)** Quantification of HR cell death caused by CC<sub>OG3</sub>-eYFP (WT), N-terminal truncations (ΔN), and L-to-E variants (2E/3E) for MpCnL1, MppCnL1, and CrCnL1 domains. Cell death was scored (HR index) 5 days post agroinfiltration. Data from three independent experimental replicates are shown (n ≥ 9 infiltrations per replicate).

**(F)** Graphical representation of the MADA-to-MAEPL N-terminal motif swapping experimental design. An autoactive variant of MADA-CC-NLR NbNRC4<sup>D478V</sup> is used as a scaffold to assess N-terminal motif competency in *N. benthamiana*.

**(G)** HR cell death induction of NbNRC4<sup>D478V</sup>-6HA chimeras transiently expressed in *N. benthamiana*. N-terminal motif chimeras were generated using motifs belonging to the indicated receptors. The presence of a MAEPL motif is indicated (+/-). Cell death was scored (HR index) 5 days post agroinfiltration. Data from three independent experimental replicates are shown (n ≥ 9 infiltrations per replicate).

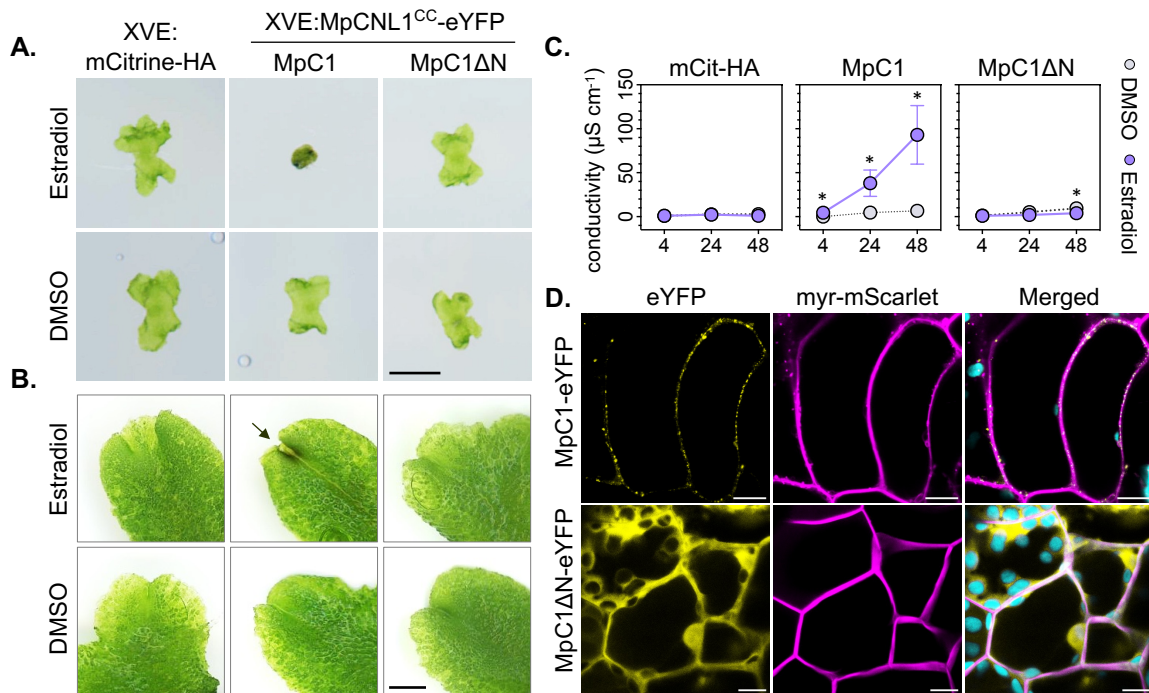

**Figure 5. MAEPL-CC<sub>OG3</sub> activates an immune-like response in the liverwort *Marchantia polymorpha***

**(A)** Macroscopic phenotypes of *Marchantia* transgenic lines XVE:mCitrine-HA (mCit-HA), XVE:MpCNL1<sup>CC</sup>-eYFP (MpC1, line 1), or the N-terminally truncated XVE:MpCNL1<sup>CCΔN</sup>-eYFP (MpC1ΔN, line 3) grown on estradiol (20 μM) or DMSO (0.1%) control media. Images are representative of growth phenotypes observed in 3 experimental replicates (n = 8 plants) at 4 days post plating. Scale bar = 2 mm.

**(B)** Macroscopic phenotypes of *Marchantia* transgenic lines XVE:mCitrine-HA (mCit-HA), XVE:MpCNL1<sup>CC</sup>-eYFP (MpC1, line 1), or XVE:MpCNL1<sup>CCΔN</sup>-eYFP (MpC1ΔN, line 3) 1 day post vacuum infiltration with estradiol (50 μM) or DMSO (0.25% in water). Images are representative of phenotypes observed in 3 or more experimental replicates (n ≥ 8 plants). An arrow indicates tissue darkening at the apical notch of MpC1 liverworts. Scale bar = 2 mm.

**(C)** Conductivity (μS cm<sup>-1</sup>) of *Marchantia* thalli treated with estradiol (50 μM) or DMSO (0.25%) at 4, 24, and 48 hours post infiltration (hpi). Statistically significant differences are denoted by an asterisk (\* p < 0.05, Student's t-test). Error bars represent standard deviation of the mean. Data from three independent experimental replicates is presented (n=12 plants per experiment).

**(D)** Confocal fluorescence microscopy shows the localization of MpC1-eYFP and MpC1ΔN-eYFP alongside a myristolated-mScarlet (myr-mScarlet) membrane marker in *Marchantia polymorpha*. Images were acquired 24 hours post estradiol treatment (20 μM) in MpC1-eYFP/myr-mScarlet (XVE:MpCNL1<sup>CC</sup>-eYFP/MpEF1a:myr-mScarlet) and MpC1ΔN-eYFP/myr-mScarlet (XVE:MpCNL1<sup>CCΔN</sup>-eYFP/MpEF1a:myr-mScarlet) transgenic lines. Plastid autofluorescence is false-colored in cyan. Scale bars = 10 μm. Images are representative of 3 experimental replicates.

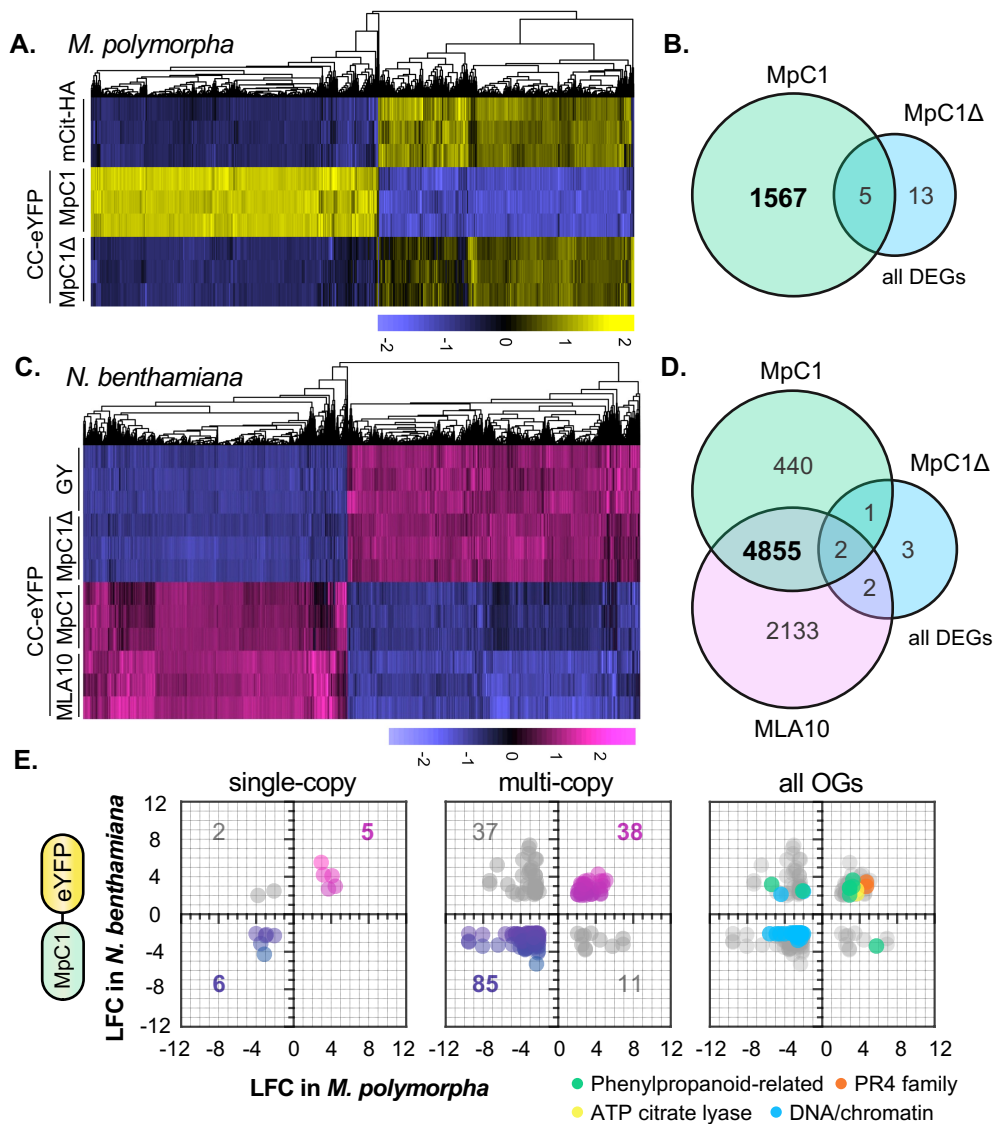

**Figure 6. CC<sub>OG3</sub> activates conserved immune-like transcriptional responses in flowering and non-flowering plants**

**(A)** Hierarchical clustering of significantly differentially expressed genes in mCit-HA (XVE:mCitrine-HA), MpC1 (XVE:MpCNL1<sup>CC</sup>-eYFP, line 1), and MpC1Δ (XVE:MpCNL1<sup>CCΔN</sup>-eYFP, line 3) *M. polymorpha* transgenics 24 hours after vacuum infiltration with 20 μM estradiol (adjusted p-value < 10<sup>-3</sup>, log fold change (|LFC|) ≥ 2). Variance-stabilized row-centered counts are shown.

**(B)** Total number of differentially expressed genes (DEGs) shared between *M. polymorpha* MpC1 and MpC1Δ transgenic lines. Differential expression is based on comparisons to the mCit-HA control.

**(C)** Hierarchical clustering of significantly differentially expressed genes in *N. benthamiana* leaves transiently expressing GY (GUS-YFP), MpC1 (MpCNL1<sup>CC</sup>-eYFP), MpC1Δ (MpCNL1<sup>CCΔN</sup>-eYFP), or the angiosperm CC domain of MLA10 (MLA10<sup>CC</sup>-eYFP) at 24 hours post agroinfiltration (adjusted p-value < 10<sup>-3</sup>, log fold change (|LFC|) ≥ 2). Variance-stabilized row-centered counts are shown.

**(D)** Total number of differentially expressed genes (DEGs) shared in *N. benthamiana* leaves transiently expressing MLA10, MpC1, or MpC1Δ. Differential expression is based on comparisons to the GUS-YFP control treatment.

**(E)** Orthology analysis of *Marchantia* and *Nicotiana* MpCNL1<sup>CC</sup>-eYFP transcriptomes. Orthologous genes belonging to single or multi-copy orthogroups having an adjusted p-value < 10<sup>-3</sup> and log fold change (LFC) ≥ 2 or ≤ -2 were considered. Numbers of DEGs per sector and functional enrichment categories are indicated.
